# Supplementary material for: Fecal Bile Acids and Neutral Sterols Are Associated with Latent Microbial Subgroups in the Human Gut
Source: MDPI journal article supplement (doi:10.3390/metabo12090846), 2022-09-08

## Supplementary Figures

**Supplementary Figure S1.** Heat map displaying the results of a sensitivity analysis excluding participants taking lipid-lowering medications, including statins.

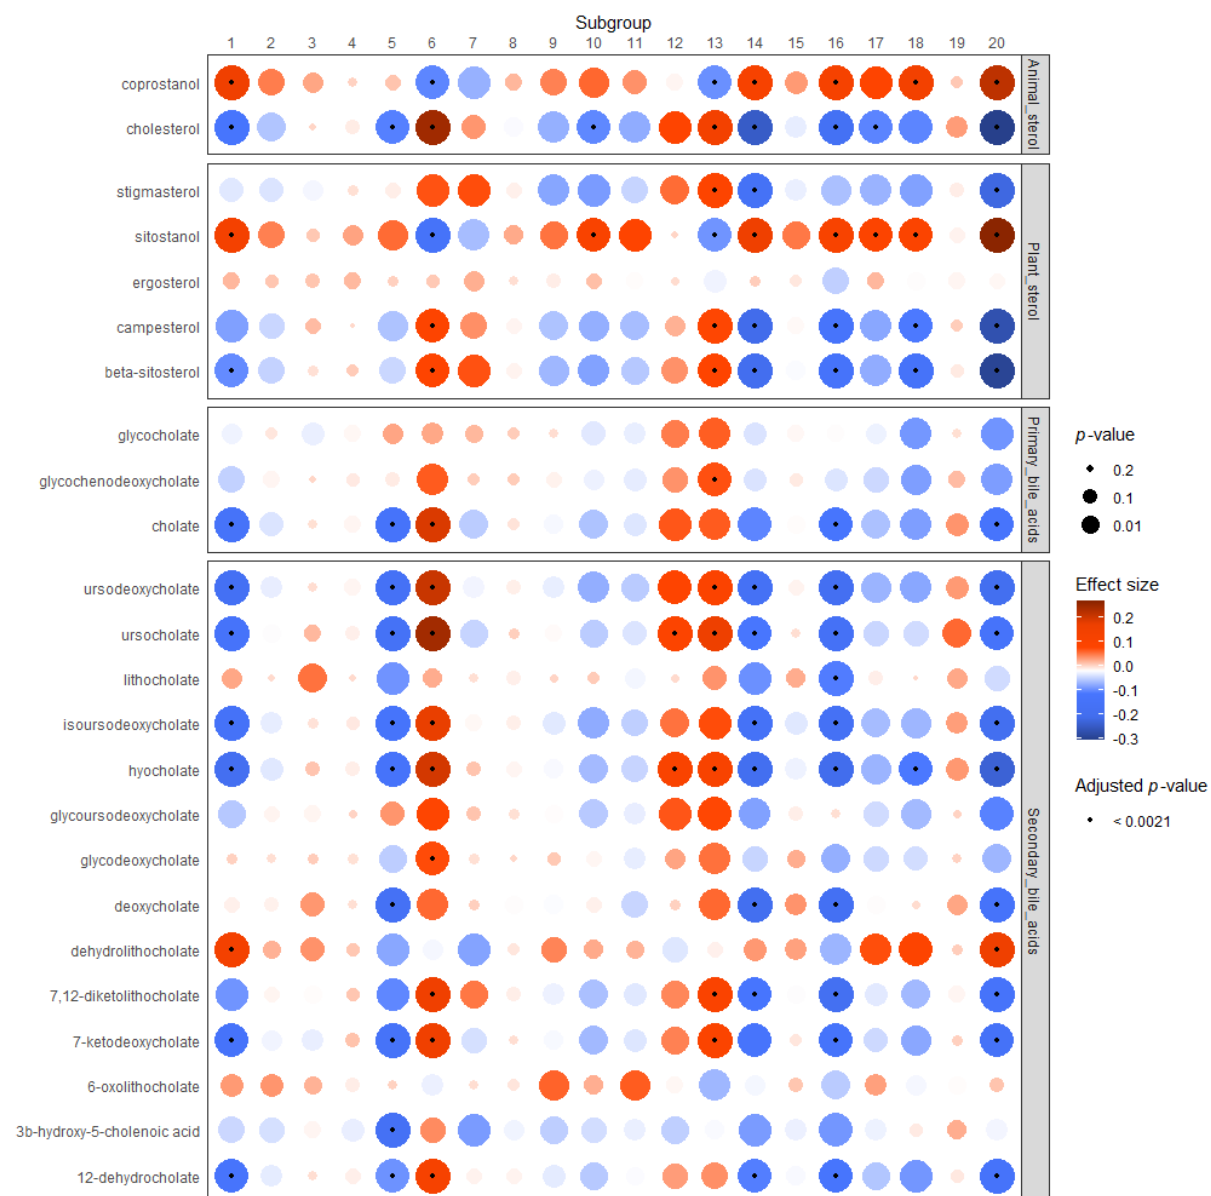

**Supplementary Figure S2.** Non-linear associations between stigmasterol and the 20 microbial subgroups. The blue line represents the non-linear association while the dotted line represents the linear trend. p1 and p2 represent the p-values for the linear and quadratic terms, respectively, for the non-linear model.

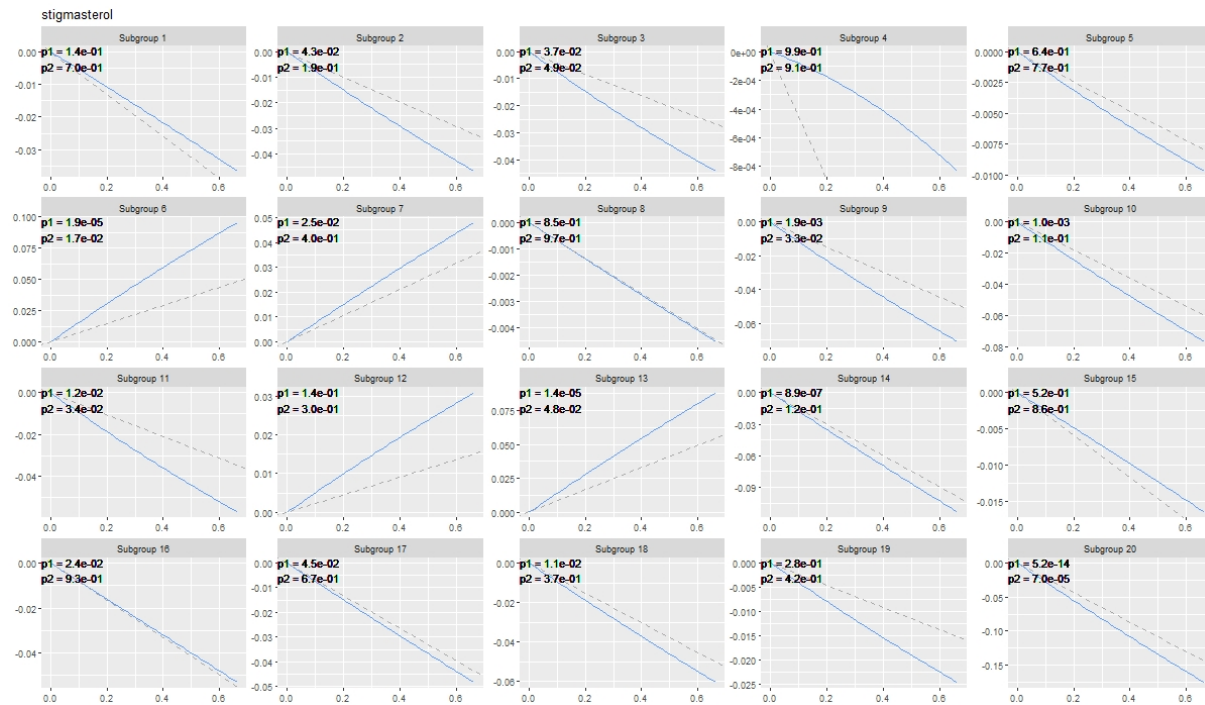

**Supplementary Figure S3.** Non-linear associations between sitostanol and the 20 microbial subgroups. The blue line represents the non-linear association while the dotted line represents the linear trend. p1 and p2 represent the p-values for the linear and quadratic terms, respectively, for the non-linear model.

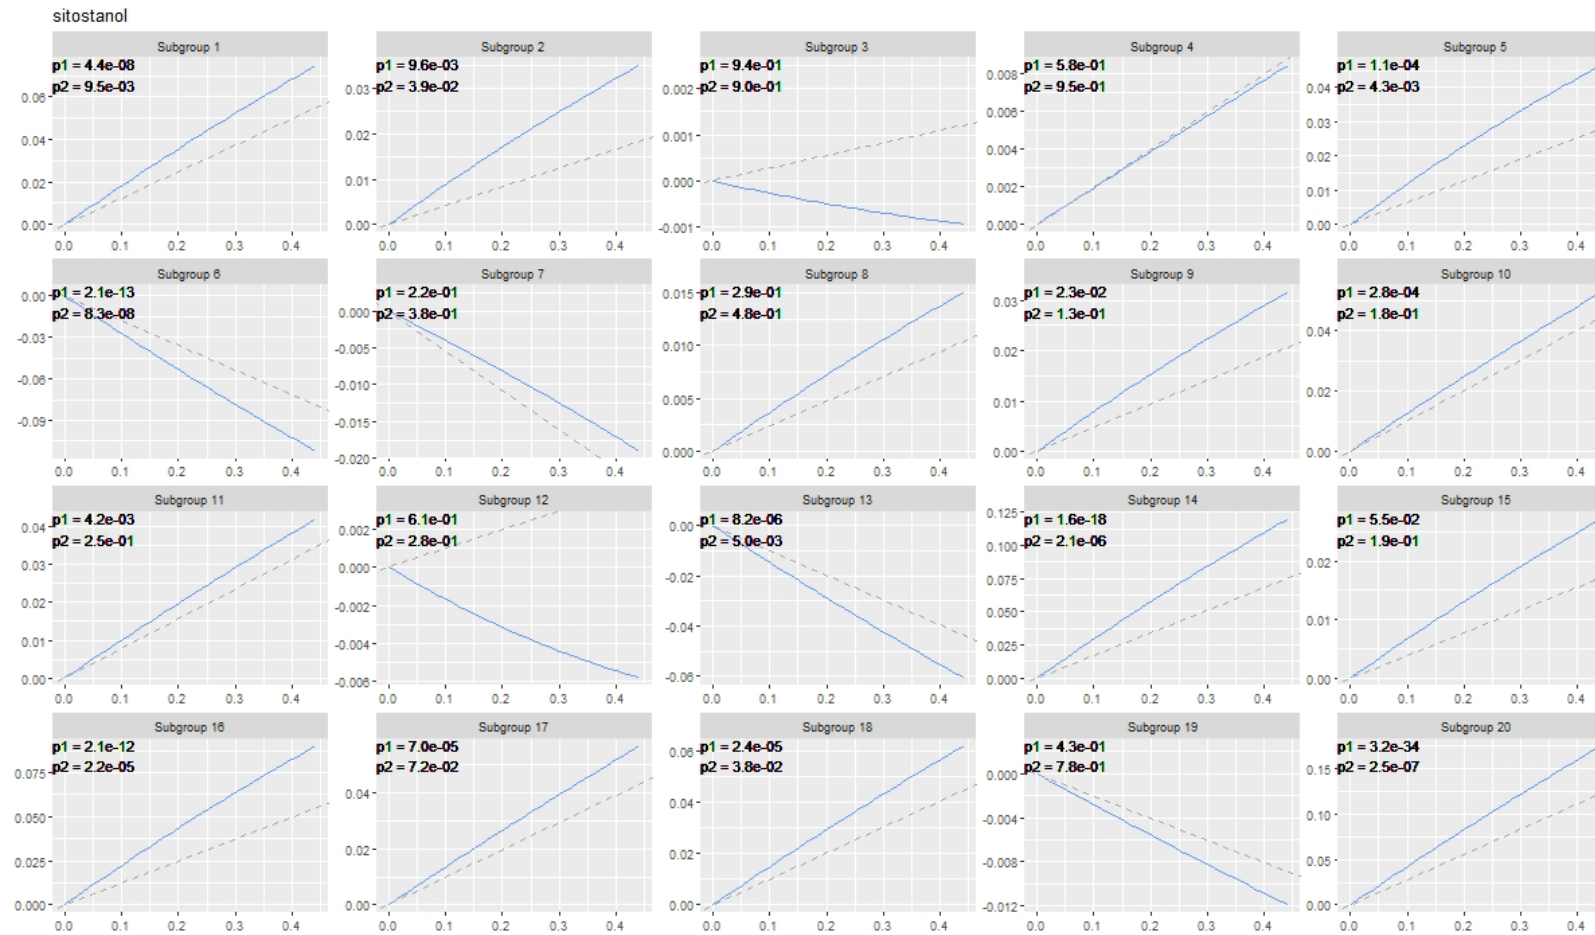

**Supplementary Figure S4.** Non-linear associations between ergosterol and the 20 microbial subgroups. The blue line represents the non-linear association while the dotted line represents the linear trend. p1 and p2 represent the p-values for the linear and quadratic terms, respectively, for the non-linear model.

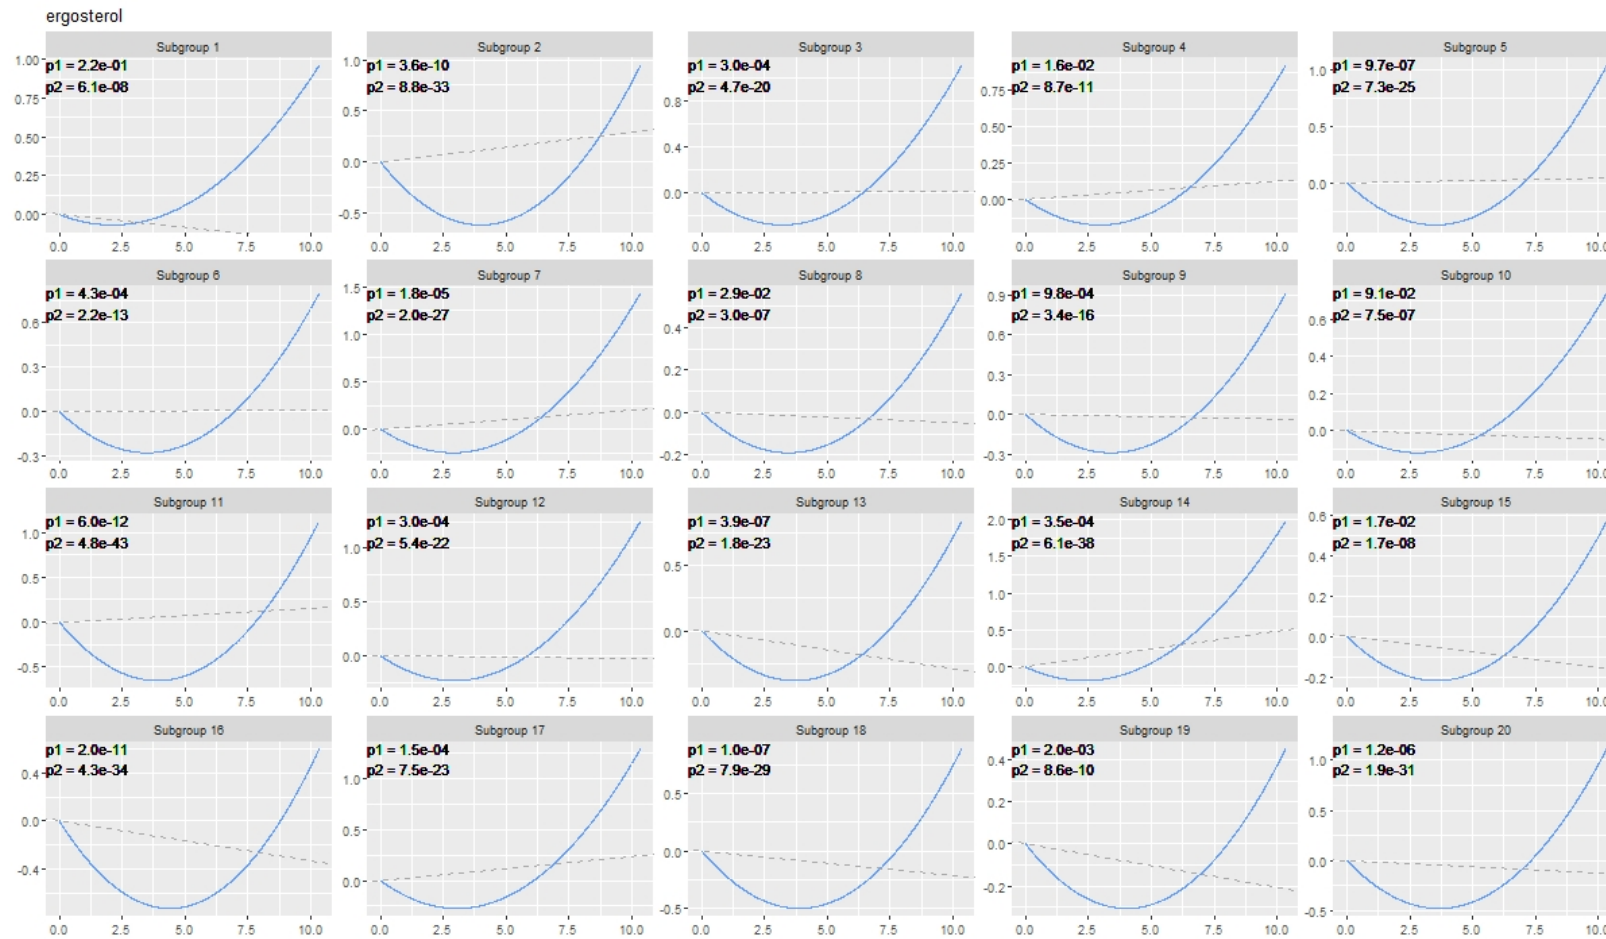

**Supplementary Figure S5.** Non-linear associations between campesterol and the 20 microbial subgroups. The blue line represents the non-linear association while the dotted line represents the linear trend. p1 and p2 represent the p-values for the linear and quadratic terms, respectively, for the non-linear model.

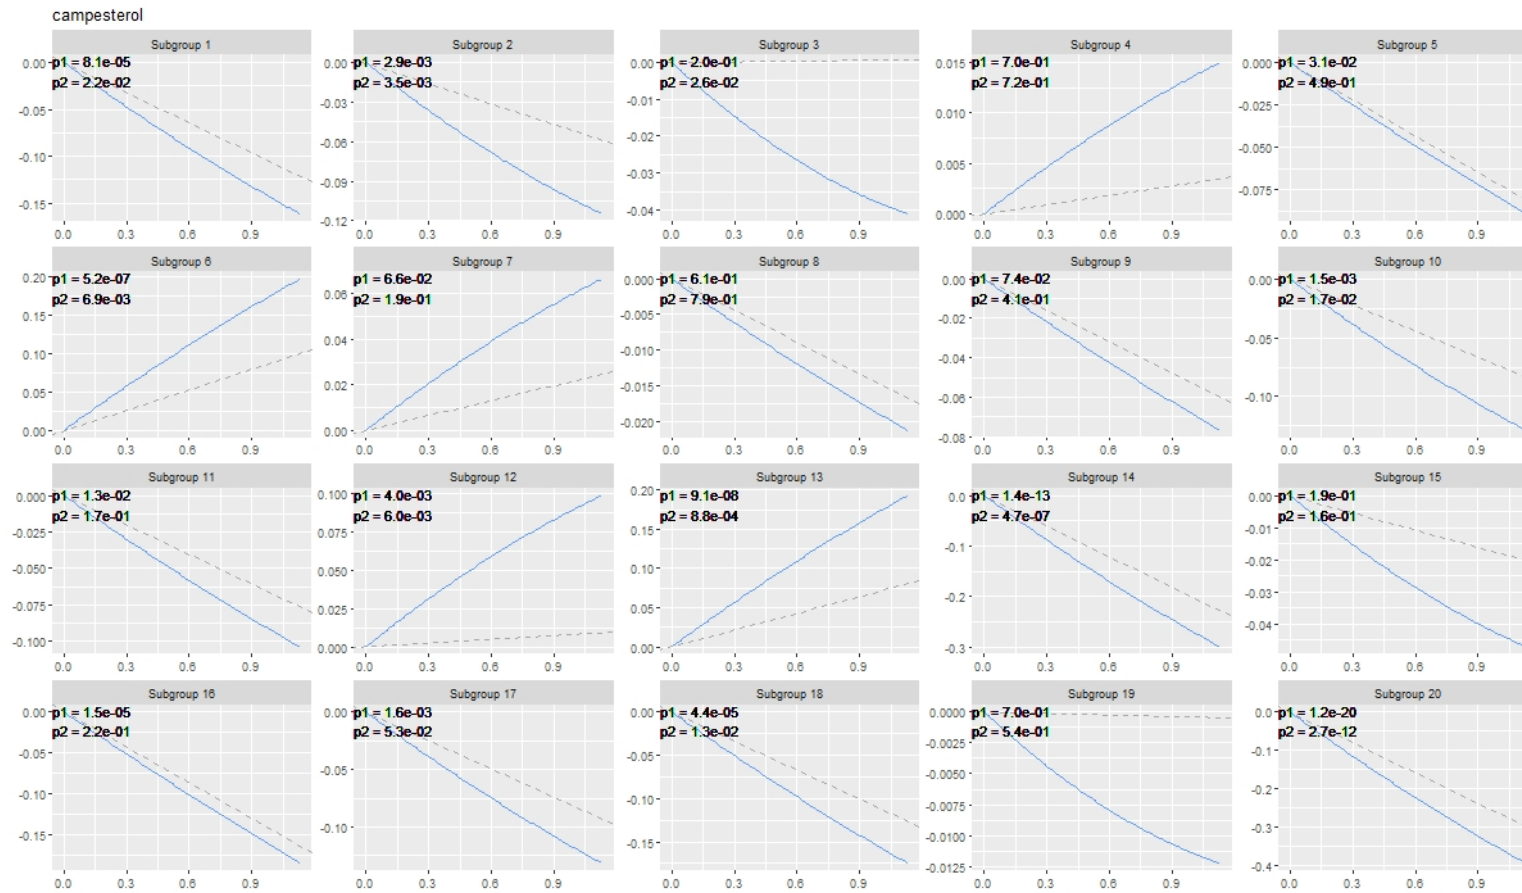

**Supplementary Figure S6.** Non-linear associations between beta-sitosterol and the 20 microbial subgroups. The blue line represents the non-linear association while the dotted line represents the linear trend. p1 and p2 represent the p-values for the linear and quadratic terms, respectively, for the non-linear model.

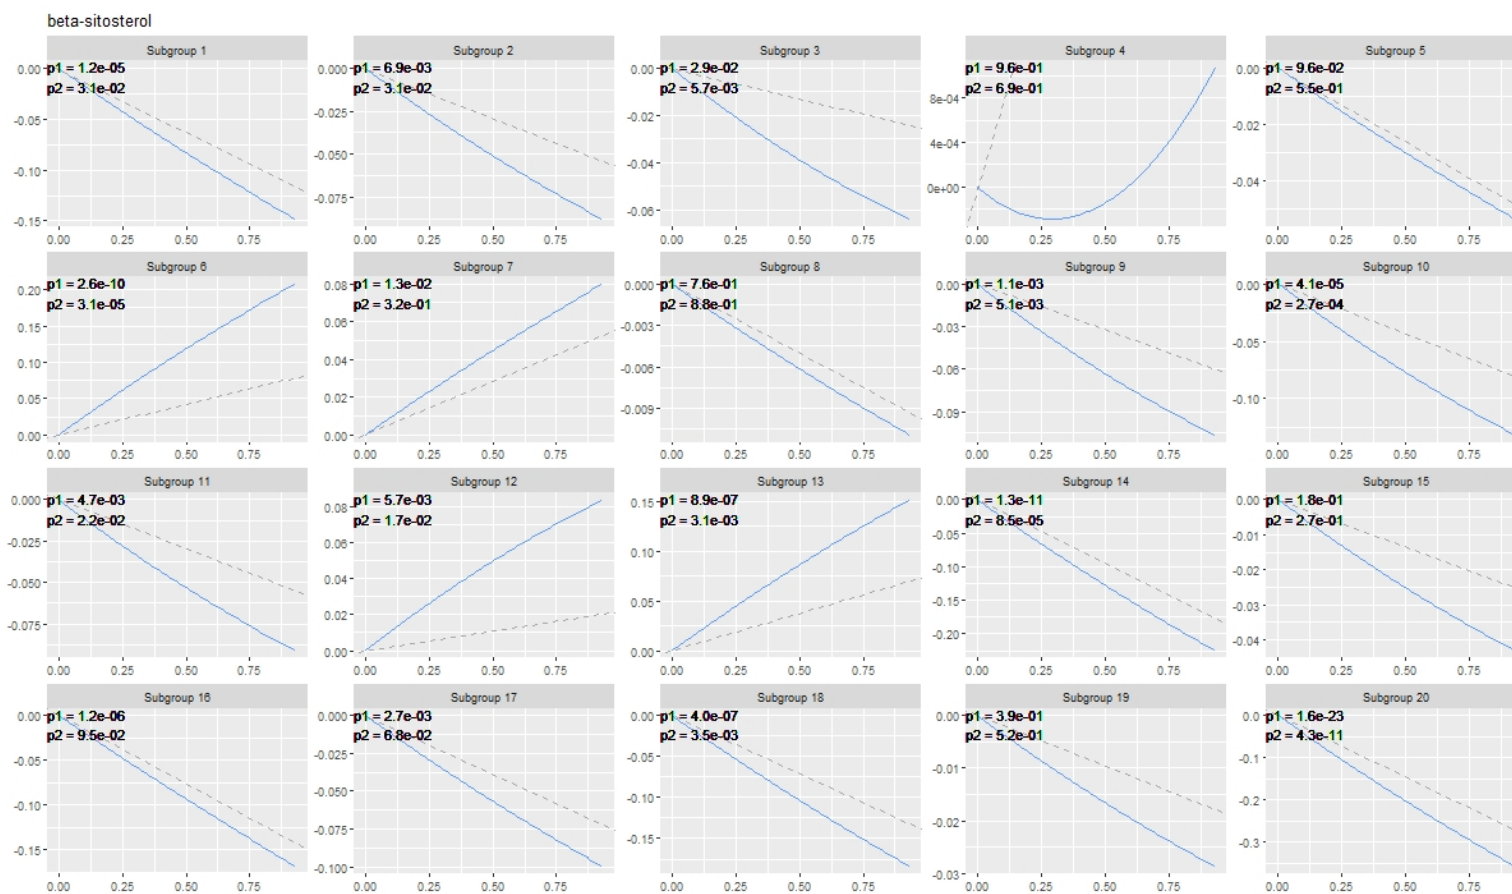

Supplement: s1 [file s1]
