# Supplementary material for: Fecal Bile Acids and Neutral Sterols Are Associated with Latent Microbial Subgroups in the Human Gut
Source: MDPI journal article supplement (doi:10.3390/metabo12090846), 2022-09-08
Supplement: s1 [file s1]

**Supplementary Table S9.** Metabolite synonyms.

| Metabolite names                  | Synonyms                                                                                                                                                           |
|-----------------------------------|--------------------------------------------------------------------------------------------------------------------------------------------------------------------|
| Stigmasterol                      | 3 $\beta$ -Hydroxy-24-ethyl-5,22-cholestadiene,<br>5,22-Stigmastadien-3 $\beta$ -ol                                                                                |
| Sitostanol                        | dihydrositosterol; (3 $\beta$ )-stigmastan-3-ol;<br>(3 $\beta$ ,5 $\alpha$ )-stigmastan-3-ol                                                                       |
| Beta-sitosterol                   | 22,23-Dihydrostigmasterol, 5-Stigmasten-3 $\beta$ -ol,<br>$\alpha$ -Dihydrofucosterol, 24 $\alpha$ -Ethylcholesterol                                               |
| Campesterol                       | 24 $\alpha$ -Methyl-5-cholesten-3 $\beta$ -ol, 24(R)-Ergost-5-en-3 $\beta$ -ol                                                                                     |
| Ergosterol                        | 3 $\beta$ -Hydroxy-5,7,22-ergostatriene, Provitamin D <sub>2</sub> ,<br>5,7,22-Ergostatrien-3 $\beta$ -ol,                                                         |
| Cholesterol                       | 3 $\beta$ -Hydroxy-5-cholestene, 5-Cholesten-3 $\beta$ -ol,                                                                                                        |
| Coprostanol                       | 5 $\beta$ -Cholestan-3 $\beta$ -ol                                                                                                                                 |
| <b>salt of ...</b>                |                                                                                                                                                                    |
| Cholate                           | 3 $\alpha$ ,7 $\alpha$ ,12 $\alpha$ -Trihydroxy-5 $\beta$ -cholan-24-oic acid                                                                                      |
| Glycocholate                      | N-(3 $\alpha$ ,7 $\alpha$ ,12 $\alpha$ -Trihydroxy-24-oxocholan-24-yl)glycine                                                                                      |
| Glycochenodeoxycholate            | N-(3 $\alpha$ ,7 $\alpha$ -Dihydroxy-24-oxocholan-24-yl)glycine                                                                                                    |
| 12-dehydrocholate                 | 5 $\beta$ -Cholan-24-oic acid-3,5,12-trione, (5 $\beta$ )-3,7,12-<br>Trioxocholan-24-oic acid, 3,7,12-Trioxo-5 $\beta$ -cholan-<br>acid                            |
| Lithocholate                      | 3 $\alpha$ -Hydroxy-5 $\beta$ -cholan-24-oic acid, 3 $\alpha$ -Hydroxy-5 $\beta$ -<br>cholan-24-oic acid-3 $\alpha$ -ol                                            |
| 6-oxolithocholate                 | -                                                                                                                                                                  |
| 7,12-diketolithocholate           | -                                                                                                                                                                  |
| Dehydrolithocholate               | -                                                                                                                                                                  |
| 3 $\beta$ -hydroxy-5-chenoic acid | (25R)-cholest-5-en-26-oic acid, 3 $\beta$ -hydroxy                                                                                                                 |
| Deoxycholate                      | 3 $\alpha$ ,12 $\alpha$ -Dihydroxy-5 $\beta$ -cholan-24-oic acid                                                                                                   |
| Glycodeoxycholate                 | N-(3 $\alpha$ ,12 $\alpha$ -Dihydroxy-24-oxocholan-24-yl)glycine,                                                                                                  |
| Glycoursodeoxycholate             | N-(3 $\alpha$ ,7 $\beta$ -Dihydroxy-5 $\beta$ -cholan-24-oyl)glycine, N-<br>[(3 $\alpha$ ,5 $\beta$ ,7 $\beta$ )-3,7-Dihydroxy-24-oxocholan-24-yl]glycine          |
| Ursodeoxycholate                  | 5 $\beta$ -Cholan-24-oic acid-3 $\alpha$ ,7 $\beta$ -diol, 3 $\alpha$ ,7 $\beta$ -Dihydroxy-<br>5 $\beta$ -cholan-24-oic acid, 7 $\beta$ -Hydroxylithocholic acid, |
| Isoursodeoxycholate               | -                                                                                                                                                                  |
| 7-ketodeoxycholate                | -                                                                                                                                                                  |
| Hyocholate                        | 3 $\alpha$ ,6 $\alpha$ ,7 $\alpha$ -trihydroxy-5 $\beta$ -cholan-24-oic acid                                                                                       |
| Ursocholate                       | 3 $\alpha$ ,7 $\beta$ ,12 $\alpha$ -trihydroxy-5 $\beta$ -cholan-24-oic acid                                                                                       |
