# Supplementary material for: Fecal Bile Acids and Neutral Sterols Are Associated with Latent Microbial Subgroups in the Human Gut
Source: Metabolites. 2022 Sep 8;12(9):846. doi: 10.3390/metabo12090846 (PMC9504437; doi:10.3390/metabo12090846)
Supplement: Supplementary file 1 [file metabolites-12-00846-s001.zip]

Archive with 4 entries (4 files):
- Supplementary Figures S1-S6.pdf
- Supplementary Table S9.pdf
- Supplementary Tables S1-S4.xlsx
- Supplementary Tables S5-S8.xlsx
