# Supplementary material for: Fecal Bile Acids and Neutral Sterols Are Associated with Latent Microbial Subgroups in the Human Gut
Source: Metabolites. 2022 Sep 8;12(9):846. doi: 10.3390/metabo12090846 (PMC9504437; doi:10.3390/metabo12090846)
Supplement: Supplementary file 1 [file metabolites-12-00846-s001.zip › Supplementary Tables S1-S4.xlsx]

## Sheet: Animal sterols
Table S1: Results of the Dirichlet regression models for the association between fecal animal sterols and microbial subgroups
Metabolite	Estimate	Std. Error	Pr(>|z|)
cholesterol.Subgroup.1	-0.141198250387697	0.0300742369301146	2.66619e-06		P-values:
cholesterol.Subgroup.2	-0.0667879839613572	0.0297729029112402	0.0248809		Unadjusted <0.05
cholesterol.Subgroup.3	-0.0146429281024851	0.0283032963237922	0.604906		Adjusted <0.00208
cholesterol.Subgroup.4	-0.00667642067069503	0.0277928843377525	0.810159
cholesterol.Subgroup.5	-0.128116654346611	0.0279266104410113	4.48329e-06		Subgroup_matrix ~ x + age + sex + education + waist circumference + physical activity
cholesterol.Subgroup.6	0.240559428444704	0.0241841761748051	2.59962e-23		n=1280
cholesterol.Subgroup.7	0.0134931042910383	0.02634406273959	0.60852
cholesterol.Subgroup.8	-0.021302415652699	0.0285850429667671	0.456133
cholesterol.Subgroup.9	-0.0677185569517512	0.0289193828548025	0.0191996
cholesterol.Subgroup.10	-0.0977285596996788	0.0301076380807761	0.0011705
cholesterol.Subgroup.11	-0.0782656900731124	0.0296271958865695	0.0082495
cholesterol.Subgroup.12	0.053085546895629	0.0250438122601343	0.0340308
cholesterol.Subgroup.13	0.131150514055844	0.0228275742748163	9.17759e-09
cholesterol.Subgroup.14	-0.237209066320779	0.0321446661581426	1.58978e-13
cholesterol.Subgroup.15	-0.0350352818608074	0.0289992055204345	0.226991
cholesterol.Subgroup.16	-0.191410102737455	0.0299851205575982	1.73082e-10
cholesterol.Subgroup.17	-0.103073415801761	0.0293723273845331	0.000449454
cholesterol.Subgroup.18	-0.101989175172265	0.031738715367012	0.00131174
cholesterol.Subgroup.19	0.0198982877235424	0.0282153279908684	0.480667
cholesterol.Subgroup.20	-0.300526470664314	0.0344110617650919	2.47072e-18
Metabolite	Estimate	Std. Error	Pr(>|z|)
coprostanol.Subgroup.1	0.141618721555706	0.0240632399672527	3.97399e-09
coprostanol.Subgroup.2	0.0505667402066311	0.0267182615886352	0.0584123
coprostanol.Subgroup.3	0.0249631548445948	0.0279930681907892	0.372521
coprostanol.Subgroup.4	0.00122470217421183	0.02742934565451	0.964387
coprostanol.Subgroup.5	0.0127186225488105	0.0232149758478956	0.583786
coprostanol.Subgroup.6	-0.134856527838725	0.0305731574372618	1.0292e-05
coprostanol.Subgroup.7	-0.0659131565267344	0.0258005428173545	0.0106273
coprostanol.Subgroup.8	0.0183322056225836	0.0278555997262056	0.510464
coprostanol.Subgroup.9	0.0545999284609863	0.0266316705887209	0.0403461
coprostanol.Subgroup.10	0.0623204109206689	0.025069057643747	0.0129206
coprostanol.Subgroup.11	0.0413443941753285	0.0262352189343828	0.115046
coprostanol.Subgroup.12	-0.0157361928215959	0.0263595944193973	0.55052
coprostanol.Subgroup.13	-0.110919682782384	0.0280082306760445	7.48704e-05
coprostanol.Subgroup.14	0.121327671701186	0.0249510179740027	1.15834e-06
coprostanol.Subgroup.15	0.0250676919727819	0.0269171915940723	0.351704
coprostanol.Subgroup.16	0.114682049249832	0.0233479146323182	9.02093e-07
coprostanol.Subgroup.17	0.0884374312308742	0.0261947812126874	0.000735086
coprostanol.Subgroup.18	0.13316494831331	0.0255554917396049	1.88013e-07
coprostanol.Subgroup.19	-0.00298662548629154	0.0288462461319998	0.917538
coprostanol.Subgroup.20	0.220991932732123	0.0210117298367645	7.17136e-26

## Sheet: Plant sterols
Table S2: Results of the Dirichlet regression models for the association between fecal plant sterols and microbial subgroups
Metabolite	Estimate	Std. Error	Pr(>|z|)	Estimate²	Std. Error²	Pr(>|z|)²
stigmasterol.Subgroup.1	-0.0533238339240085	0.0363718345391563	0.142628	-0.00284740153455884	0.00729598784200356	0.696337		P-values:
stigmasterol.Subgroup.2	-0.0766785730685459	0.0379481305523065	0.0433196	0.00946478911107236	0.0072771094852645	0.193387		Unadjusted <0.05
stigmasterol.Subgroup.3	-0.0762125845876084	0.0364585933269429	0.036583	0.0142292107319852	0.0072390680833316	0.0493433		Adjusted <0.00208
stigmasterol.Subgroup.4	-0.000704533099484371	0.0379549267443166	0.98519	-0.000835358601558621	0.00725058178778395	0.908277
stigmasterol.Subgroup.5	-0.016058176946132	0.0338777831358471	0.635498	0.00220131989682541	0.00744672007918194	0.767528		Subgroup_matrix ~ x + I(x^2) + age + sex + education + waist circumference + physical activity
stigmasterol.Subgroup.6	0.156122253511524	0.0365261154109726	1.9177e-05	-0.0184316973974212	0.0077396889899715	0.0172445		n=1280
stigmasterol.Subgroup.7	0.076689140744379	0.0342498577566014	0.0251489	-0.00609971011592763	0.00724469782171006	0.399813
stigmasterol.Subgroup.8	-0.00701848150346837	0.0378076477965615	0.85273	0.000273475154571003	0.00722450361645165	0.969804
stigmasterol.Subgroup.9	-0.118203062758338	0.0381507841330484	0.00194626	0.017085954160265	0.00801736803820793	0.0330795
stigmasterol.Subgroup.10	-0.124000070562621	0.037755235084012	0.00102231	0.0119874139107032	0.00752165003586394	0.110998
stigmasterol.Subgroup.11	-0.0962947981686754	0.0382156052762412	0.0117429	0.0156269424887439	0.00735399877045728	0.0335901
stigmasterol.Subgroup.12	0.0512195546640196	0.0349106927802877	0.142333	-0.00715254256435408	0.0069515885494582	0.303523
stigmasterol.Subgroup.13	0.141649379792618	0.0326222262767944	1.41119e-05	-0.0133163644157026	0.00673109581824662	0.0478909
stigmasterol.Subgroup.14	-0.178588340395222	0.0363460628300937	8.94401e-07	0.0111400511600491	0.00714752317380779	0.119094
stigmasterol.Subgroup.15	-0.0240166550832978	0.0369620915049095	0.515844	-0.00136080607061603	0.00751594498294854	0.856324
stigmasterol.Subgroup.16	-0.0798412752977478	0.0353592383171235	0.0239455	-0.000555322341933406	0.00643839945164337	0.931266
stigmasterol.Subgroup.17	-0.0749645420283773	0.0374628647919361	0.0453885	0.00297786166030799	0.00708148220056682	0.67411
stigmasterol.Subgroup.18	-0.0953194908196414	0.0375819992267759	0.0112028	0.00579151958524983	0.00639651182184782	0.365244
stigmasterol.Subgroup.19	-0.0409459132035793	0.0378644519075063	0.279528	0.00544838449635362	0.00678780843186261	0.422164
stigmasterol.Subgroup.20	-0.281053852538031	0.0373406023539148	5.20138e-14	0.0240998090244731	0.00606152412357632	7.01235e-05
Metabolite	Estimate	Std. Error	Pr(>|z|)	Estimate²	Std. Error²	Pr(>|z|)²
sitostanol .Subgroup.1	0.183950220813371	0.0336093992500134	4.42036e-08	-0.0331096630328117	0.0127612681900388	0.00947167
sitostanol .Subgroup.2	0.0904263575033553	0.0348924016386442	0.00955371	-0.0248799059406769	0.012061405226791	0.0391345
sitostanol .Subgroup.3	-0.00273785086049165	0.0352855406812268	0.938153	0.00142446618343559	0.0117009617852671	0.903106
sitostanol .Subgroup.4	0.0193847981917474	0.0354355322404646	0.584348	-0.000618568059486255	0.010424299386452	0.952682
sitostanol .Subgroup.5	0.122321542157693	0.0316904904103741	0.000113442	-0.038628454951016	0.0135223013669825	0.0042814
sitostanol .Subgroup.6	-0.275409264968233	0.0375079863182977	2.09354e-13	0.048514761962696	0.00905102453983314	8.31573e-08
sitostanol .Subgroup.7	-0.0386826133146721	0.0314077338179624	0.218088	-0.00980324426404297	0.0110741266972447	0.376028
sitostanol .Subgroup.8	0.0375870333598914	0.0353538186923726	0.287706	-0.00813446384479606	0.0116087364045361	0.483478
sitostanol .Subgroup.9	0.080478954398927	0.0352911602222672	0.0225823	-0.0201469989326126	0.013185529157495	0.126522
sitostanol .Subgroup.10	0.127225858654905	0.0349761536677467	0.000275294	-0.0171992913227576	0.0129339589452393	0.183591
sitostanol .Subgroup.11	0.101123725935517	0.0353211241283465	0.00419675	-0.0140768305574568	0.0123654921781477	0.254955
sitostanol .Subgroup.12	-0.0178486941919857	0.035003692393478	0.610115	0.0107266940848033	0.0100315714413666	0.284937
sitostanol .Subgroup.13	-0.148636979741735	0.0333328486934544	8.2276e-06	0.0254940712463837	0.00908784917790075	0.0050271
sitostanol .Subgroup.14	0.301823860101784	0.0343605188901501	1.57718e-18	-0.068537925703957	0.0144450291140346	2.08773e-06
sitostanol .Subgroup.15	0.0680318244707067	0.0354533885243826	0.0549959	-0.0150222665930948	0.0114925057355018	0.191167
sitostanol .Subgroup.16	0.228682484157747	0.0325247842648674	2.05026e-12	-0.0560692373140131	0.0132037630498205	2.17176e-05
sitostanol .Subgroup.17	0.13653084279918	0.0343300618924183	6.97886e-05	-0.0197231515795226	0.0109443168850789	0.071524
sitostanol .Subgroup.18	0.151591958845332	0.0358966305213111	2.41057e-05	-0.0263645794552033	0.0126880937248462	0.0377186
sitostanol .Subgroup.19	-0.028429481750636	0.0359233858273788	0.428715	0.00321649058602888	0.0117841189667495	0.784891
sitostanol .Subgroup.20	0.426818932791441	0.0349889064990308	3.15853e-34	-0.0722935305848899	0.0140196723687028	2.51504e-07
Metabolite	Estimate	Std. Error	Pr(>|z|)	Estimate²	Std. Error²	Pr(>|z|)²
beta-sitosterol.Subgroup.1	-0.174654685861028	0.0399319482406605	1.22098e-05	0.0167673653598807	0.00775840226297425	0.0306808
beta-sitosterol.Subgroup.2	-0.11077262449403	0.0409834255555173	0.00687449	0.0179574030166795	0.00834697219526673	0.0314472
beta-sitosterol.Subgroup.3	-0.0879187852311712	0.0402105889989382	0.0287821	0.0208825799484953	0.00755709261463656	0.00572186
beta-sitosterol.Subgroup.4	-0.00194972584238605	0.041009258792464	0.96208	0.00332028387333729	0.00829944867442306	0.689112
beta-sitosterol.Subgroup.5	-0.0624456048421867	0.0375604981252375	0.0964058	0.00506415071540084	0.00845366892887962	0.549141
beta-sitosterol.Subgroup.6	0.254575999079129	0.0402664584661152	2.57725e-10	-0.0338255104006873	0.00811741861229937	3.08597e-05
beta-sitosterol.Subgroup.7	0.0938506844079958	0.0379311565913884	0.0133521	-0.0086866651385981	0.00866600634924291	0.316158
beta-sitosterol.Subgroup.8	-0.0129284393460475	0.0415489748713624	0.755678	0.00128945585943482	0.00845456936511782	0.87878
beta-sitosterol.Subgroup.9	-0.139662133826813	0.0429314176122709	0.00114135	0.0275814894976694	0.00984523227943641	0.00508645
beta-sitosterol.Subgroup.10	-0.167440623737272	0.0408400805892279	4.13312e-05	0.0280492677196113	0.00770621276502216	0.000272823
beta-sitosterol.Subgroup.11	-0.116273533659273	0.0411127194598773	0.00468157	0.0198409095671576	0.00868043986440101	0.0222716
beta-sitosterol.Subgroup.12	0.110141435291083	0.0398682229669755	0.00573365	-0.0219254188946983	0.00915624788166668	0.0166392
beta-sitosterol.Subgroup.13	0.183724241219961	0.0373853308940327	8.90819e-07	-0.0227958268826718	0.00770578579420315	0.00309367
beta-sitosterol.Subgroup.14	-0.268649439395061	0.0396802122939803	1.2846e-11	0.0292461066526326	0.00744449459520066	8.54578e-05
beta-sitosterol.Subgroup.15	-0.0543425723836619	0.0405942785569512	0.180676	0.00869911090852166	0.0079349499727089	0.272946
beta-sitosterol.Subgroup.16	-0.192646561694062	0.0397336777790171	1.24433e-06	0.0129105215474644	0.00774157011272854	0.0953777
beta-sitosterol.Subgroup.17	-0.120344418138007	0.0401663887011947	0.00273414	0.0143864846831811	0.00787891811975328	0.0678583
beta-sitosterol.Subgroup.18	-0.217205408033768	0.0428557868080121	4.01413e-07	0.0211675803185551	0.00724307717672108	0.00347282
beta-sitosterol.Subgroup.19	-0.0355519402686737	0.0415114810333976	0.391756	0.0051802340882253	0.00810605969091118	0.522786
beta-sitosterol.Subgroup.20	-0.426639731701256	0.042679762128231	1.58197e-23	0.0452131148485682	0.00685679720512333	4.28387e-11
Metabolite	Estimate	Std. Error	Pr(>|z|)	Estimate²	Std. Error²	Pr(>|z|)²
campesterol.Subgroup.1	-0.162742695149595	0.0412798479710657	8.0662e-05	0.0178461813513834	0.00780016553494781	0.022142
campesterol.Subgroup.2	-0.128246080070455	0.0430574000074716	0.00289671	0.0237641517606773	0.00813131909662684	0.00347183
campesterol.Subgroup.3	-0.0533547080820163	0.0414322175639565	0.19783	0.0150772305619159	0.0067858485882962	0.0262925
campesterol.Subgroup.4	0.0161695131695535	0.0413431484183846	0.69572	-0.002580899389875	0.00730572422649792	0.723885
campesterol.Subgroup.5	-0.0847221258433845	0.0392748015535383	0.030993	0.0054145496477223	0.00793357625561709	0.494932
campesterol.Subgroup.6	0.196138491551718	0.0390890465672939	5.22841e-07	-0.0201489701982127	0.0074646472703941	0.00694954
campesterol.Subgroup.7	0.0721693975684186	0.039325539479127	0.0664792	-0.0118116420437159	0.00893607429966944	0.186237
campesterol.Subgroup.8	-0.0211435452935067	0.0417968565440278	0.612952	0.00205670165591367	0.00761334926820552	0.787049
campesterol.Subgroup.9	-0.0741693796044675	0.041479545774432	0.0737606	0.0055902397382942	0.00681241490283661	0.411876
campesterol.Subgroup.10	-0.133102349765846	0.0419216245044954	0.00149822	0.0171224162800321	0.00717847358385242	0.0170678
campesterol.Subgroup.11	-0.10266334927346	0.0411306829363969	0.0125593	0.00970231783282884	0.00702434717714519	0.167205
campesterol.Subgroup.12	0.110051035983101	0.0382606034263652	0.00402298	-0.0202793866184039	0.00738040241444611	0.00600086
campesterol.Subgroup.13	0.195457518230533	0.0365770056746441	9.10549e-08	-0.0220575944796113	0.00663324322362541	0.000883201
campesterol.Subgroup.14	-0.304001326036802	0.0411104918993667	1.41687e-13	0.0351067567046738	0.00696646399625967	4.67008e-07
campesterol.Subgroup.15	-0.0545248573004128	0.0420326940483451	0.194562	0.0113824532073063	0.00819104678980393	0.164644
campesterol.Subgroup.16	-0.174232727653342	0.0402071864163715	1.46842e-05	0.00924818756561712	0.00761287746773554	0.224439
campesterol.Subgroup.17	-0.133869982580344	0.0423317622834145	0.00156474	0.0155824229164139	0.00804931567249655	0.0528837
campesterol.Subgroup.18	-0.172960266574015	0.0423468661685815	4.41966e-05	0.0163303670902682	0.00659651496478329	0.0133011
campesterol.Subgroup.19	-0.0159133123189939	0.041719623522207	0.702881	0.00450936635109432	0.00732262568767999	0.538018
campesterol.Subgroup.20	-0.397609554663134	0.0426601060431568	1.15895e-20	0.0429128241111713	0.00613867168113318	2.73768e-12
Metabolite	Estimate	Std. Error	Pr(>|z|)	Estimate²	Std. Error²	Pr(>|z|)²
ergosterol.Subgroup.1	-0.0643389248606903	0.0529826477325875	0.224618	0.015217878828502	0.00280938041157046	6.06719e-08
ergosterol.Subgroup.2	-0.308838933101319	0.0492488344825606	3.5876e-10	0.0386983625103808	0.0032452253447974	8.79927e-33
ergosterol.Subgroup.3	-0.173926026082264	0.0480512064164908	0.000295062	0.0271239464296386	0.00295794969907356	4.7369e-20
ergosterol.Subgroup.4	-0.118136788674728	0.0488380972507649	0.0155655	0.0200533693621582	0.00309094817230566	8.71145e-11
ergosterol.Subgroup.5	-0.213401545433966	0.0435757981711017	9.71875e-07	0.0303999171479786	0.00295247737510813	7.31402e-25
ergosterol.Subgroup.6	-0.159064885252579	0.0451478041350668	0.000426364	0.0228171970810082	0.00311049615012494	2.20814e-13
ergosterol.Subgroup.7	-0.173835540283505	0.0405050275967809	1.77308e-05	0.0302079853232234	0.00278420415163767	1.99919e-27
ergosterol.Subgroup.8	-0.109356675401232	0.0499393489140156	0.0285395	0.0158162488143634	0.00308700880811975	2.99937e-07
ergosterol.Subgroup.9	-0.16937405056855	0.051362763457564	0.000975136	0.0249176266779341	0.00305481011578978	3.43876e-16
ergosterol.Subgroup.10	-0.0864080750108194	0.0510883363453456	0.0907707	0.0153039738903519	0.00309299632045858	7.50013e-07
ergosterol.Subgroup.11	-0.335196042403016	0.0487256743444871	6.01689e-12	0.0429481705829131	0.00312236922265399	4.75319e-43
ergosterol.Subgroup.12	-0.157657652236512	0.0436037720954187	0.000299551	0.0269585799043189	0.00279666261029929	5.4424e-22
ergosterol.Subgroup.13	-0.205241340843609	0.0404529427725601	3.90395e-07	0.0276744126242705	0.00277259638951296	1.83841e-23
ergosterol.Subgroup.14	-0.157998498277828	0.0441487923841113	0.000345211	0.0337684997532147	0.00262247984025871	6.09999e-38
ergosterol.Subgroup.15	-0.12230003465099	0.0512771545632667	0.0170755	0.0171446770485908	0.00304066463736084	1.71574e-08
ergosterol.Subgroup.16	-0.332375792319211	0.0495521347564639	1.97854e-11	0.0377574210039513	0.00310167590777877	4.31645e-34
ergosterol.Subgroup.17	-0.179734410590837	0.0473945408219787	0.000149257	0.0294793485126586	0.00299575671372435	7.54344e-23
ergosterol.Subgroup.18	-0.258334697509048	0.0485008012953445	1.00178e-07	0.0332885929729862	0.0029879387275196	7.92344e-29
ergosterol.Subgroup.19	-0.151939423478523	0.0491516339511279	0.00199323	0.018906014268833	0.00308210186264501	8.56263e-10
ergosterol.Subgroup.20	-0.260741683616276	0.0536164059134526	1.15564e-06	0.0356087632708472	0.00305215813936546	1.88489e-31

## Sheet: Primary bile acids
Table S3: Results of the Dirichlet regression models for the association between fecal primary bile acids and microbial subgroups
Metabolite	Estimate	Std. Error	Pr(>|z|)
cholate.Subgroup.1	-0.153413894459301	0.0345063322782046	8.74988e-06
cholate.Subgroup.2	-0.0444769508795455	0.0305087484646591	0.144884		P-values:
cholate.Subgroup.3	-0.0064073533757552	0.029316140373622	0.826992		Unadjusted <0.05
cholate.Subgroup.4	0.000300175010315474	0.0307025493599304	0.992199		Adjusted <0.00208
cholate.Subgroup.5	-0.142591878711684	0.0322558844459251	9.84058e-06
cholate.Subgroup.6	0.117618952499732	0.0195344912897266	1.73245e-09		Subgroup_matrix ~ x + age + sex + education + waist circumference + physical activity
cholate.Subgroup.7	-0.0679989380692639	0.0272878996008751	0.0127059		n=1280
cholate.Subgroup.8	-0.00920870904019274	0.0286326629396114	0.747744
cholate.Subgroup.9	-0.0316592932268957	0.0290626344521292	0.276001
cholate.Subgroup.10	-0.0669170648142303	0.030315300855527	0.0272883
cholate.Subgroup.11	-0.0343036117759937	0.0299664942585913	0.25232
cholate.Subgroup.12	0.0530451016476659	0.0228154907343805	0.0200741
cholate.Subgroup.13	0.0266923882729353	0.0225842138319159	0.237244
cholate.Subgroup.14	-0.102444644354245	0.0330874875618105	0.00196035
cholate.Subgroup.15	-0.0275325915683989	0.0291880533143599	0.345536
cholate.Subgroup.16	-0.130533948419866	0.0344889143308851	0.000153827
cholate.Subgroup.17	-0.0562454039684103	0.0304999659013258	0.0651666
cholate.Subgroup.18	-0.0867825958425408	0.0332318577482102	0.0090165
cholate.Subgroup.19	0.0327086647210064	0.029145406331846	0.261753
cholate.Subgroup.20	-0.12616406393943	0.0346224492569342	0.000268438
Metabolite	Estimate	Std. Error	Pr(>|z|)
glycochenodeoxycholate.Subgroup.1	-0.0354952255931661	0.0333221944114914	0.28678
glycochenodeoxycholate.Subgroup.2	-0.0148912517422306	0.0277951104153955	0.592131
glycochenodeoxycholate.Subgroup.3	-0.00858836882218676	0.0266168288665092	0.746948
glycochenodeoxycholate.Subgroup.4	-0.00137810500866356	0.0272625544145385	0.959685
glycochenodeoxycholate.Subgroup.5	0.00237629208685645	0.0279789324515592	0.932316
glycochenodeoxycholate.Subgroup.6	0.0728577874480297	0.0233243453692789	0.00178605
glycochenodeoxycholate.Subgroup.7	0.00328155479406698	0.0262094504794781	0.900361
glycochenodeoxycholate.Subgroup.8	0.0014635188354397	0.0276499906182047	0.957788
glycochenodeoxycholate.Subgroup.9	-0.0168798813904449	0.0289793321490349	0.560243
glycochenodeoxycholate.Subgroup.10	-0.0347894477052385	0.0306856139840084	0.256904
glycochenodeoxycholate.Subgroup.11	-0.0296456024214189	0.0288573511788469	0.304272
glycochenodeoxycholate.Subgroup.12	0.0302638158391999	0.0240225545687326	0.207738
glycochenodeoxycholate.Subgroup.13	0.0694837087851413	0.0211382494573396	0.00101222
glycochenodeoxycholate.Subgroup.14	-0.00862957179812696	0.0341144074325989	0.800299
glycochenodeoxycholate.Subgroup.15	-0.0139466584005197	0.0277181273497826	0.614852
glycochenodeoxycholate.Subgroup.16	-0.0186998064613289	0.0322655272484622	0.562211
glycochenodeoxycholate.Subgroup.17	-0.0251272163954827	0.0312726338771152	0.421692
glycochenodeoxycholate.Subgroup.18	-0.0865524559803665	0.0355114226709204	0.0147969
glycochenodeoxycholate.Subgroup.19	0.00396000958912483	0.024792793315248	0.873098
glycochenodeoxycholate.Subgroup.20	-0.081191829687682	0.0336486404249653	0.0158248
Metabolite	Estimate	Std. Error	Pr(>|z|)
glycocholate.Subgroup.1	-0.0402015921123276	0.0309026617129157	0.193289
glycocholate.Subgroup.2	-0.00378141539568698	0.0286102206877243	0.89485
glycocholate.Subgroup.3	-0.0252134277469094	0.0267412955929355	0.34575
glycocholate.Subgroup.4	-0.00328377189509789	0.0273571585540958	0.904457
glycocholate.Subgroup.5	0.0263413624596316	0.0262445950657895	0.315529
glycocholate.Subgroup.6	0.0201796308611311	0.023395607034343	0.388391
glycocholate.Subgroup.7	0.0098130984178944	0.0239088676384205	0.681485
glycocholate.Subgroup.8	0.0032625622448982	0.027671486018278	0.906144
glycocholate.Subgroup.9	-0.00985603387940633	0.0273791776119894	0.71886
glycocholate.Subgroup.10	-0.0404810652321825	0.0282497879700561	0.151867
glycocholate.Subgroup.11	-0.0258022830341655	0.0290437409773305	0.374329
glycocholate.Subgroup.12	0.0455168255713396	0.0256327320274565	0.0757773
glycocholate.Subgroup.13	0.0497744965918818	0.0234144179784114	0.0335195
glycocholate.Subgroup.14	-0.0293134660229344	0.0300351942775373	0.329079
glycocholate.Subgroup.15	-0.0180604293123196	0.0287061397011285	0.529252
glycocholate.Subgroup.16	-0.0231621556235682	0.0322859253093526	0.473123
glycocholate.Subgroup.17	-0.0152705737356062	0.0302945047264455	0.614212
glycocholate.Subgroup.18	-0.0936461412319205	0.0348565884853295	0.00721807
glycocholate.Subgroup.19	0.00403360453450043	0.0276122509459512	0.883858
glycocholate.Subgroup.20	-0.0877610293994131	0.0331509085823138	0.00811328

## Sheet: Secondary bile acids
Table S4: Results of the Dirichlet regression models for the association between fecal secondary bile acids and microbial subgroups
Metabolite	Estimate	Std. Error	Pr(>|z|)
12-dehydrocholate.Subgroup.1	-0.134225136360387	0.0333096871511649	5.58688e-05		P-values:
12-dehydrocholate.Subgroup.2	-0.0393488912244477	0.0311108613482194	0.205944		Unadjusted <0.05
12-dehydrocholate.Subgroup.3	-0.00860639955988136	0.0265961294042659	0.746244		Adjusted <0.00208
12-dehydrocholate.Subgroup.4	-0.00492345954600833	0.0274265678718779	0.857534
12-dehydrocholate.Subgroup.5	-0.0932720707261177	0.0284852015509994	0.00105885		Subgroup_matrix ~ x + age + sex + education + waist circumference + physical activity
12-dehydrocholate.Subgroup.6	0.128389403447777	0.0192898644058666	2.81771e-11		n=1280
12-dehydrocholate.Subgroup.7	-0.0189129940164088	0.0261364071093422	0.469295
12-dehydrocholate.Subgroup.8	-0.0139637941940144	0.0281159691786376	0.619436
12-dehydrocholate.Subgroup.9	-0.0357417349369044	0.0287033912745003	0.213055
12-dehydrocholate.Subgroup.10	-0.0602038165160827	0.0301547016249443	0.0458797
12-dehydrocholate.Subgroup.11	-0.0247935547324765	0.0321561334996517	0.440685
12-dehydrocholate.Subgroup.12	0.0290400822743402	0.0205691424643326	0.158001
12-dehydrocholate.Subgroup.13	0.0436155154537559	0.0220156378116877	0.0475784
12-dehydrocholate.Subgroup.14	-0.105915790141716	0.0319793979331168	0.000926313
12-dehydrocholate.Subgroup.15	-0.0301886157854697	0.0291812644324258	0.300893
12-dehydrocholate.Subgroup.16	-0.13257302819984	0.0334277787104299	7.3103e-05
12-dehydrocholate.Subgroup.17	-0.0597029274430521	0.030783897643341	0.0524501
12-dehydrocholate.Subgroup.18	-0.0933507000272134	0.0323878082480051	0.0039481
12-dehydrocholate.Subgroup.19	-0.00366349375533697	0.0271767048430192	0.892768
12-dehydrocholate.Subgroup.20	-0.136528411749735	0.0337650051631961	5.26617e-05
Metabolite	Estimate	Std. Error	Pr(>|z|)
3b-hydroxy-5-cholenoic acid.Subgroup.1	-0.0487743897893229	0.028692607253683	0.0891509
3b-hydroxy-5-cholenoic acid.Subgroup.2	-0.0423423652222324	0.0288924040065397	0.142779
3b-hydroxy-5-cholenoic acid.Subgroup.3	-0.0120064895585532	0.0264560071667864	0.649952
3b-hydroxy-5-cholenoic acid.Subgroup.4	-0.0312696760906996	0.0277461431025591	0.259746
3b-hydroxy-5-cholenoic acid.Subgroup.5	-0.168013996524932	0.0289189062869407	6.25354e-09
3b-hydroxy-5-cholenoic acid.Subgroup.6	0.0317505239933403	0.0264322466659183	0.229672
3b-hydroxy-5-cholenoic acid.Subgroup.7	-0.0776484859899658	0.0293817509019516	0.00822369
3b-hydroxy-5-cholenoic acid.Subgroup.8	-0.0276194652451696	0.0280054467910168	0.324026
3b-hydroxy-5-cholenoic acid.Subgroup.9	-0.0446461394450326	0.027120391705602	0.0997184
3b-hydroxy-5-cholenoic acid.Subgroup.10	-0.0402419467624933	0.0276020515251199	0.144859
3b-hydroxy-5-cholenoic acid.Subgroup.11	-0.0225522206752333	0.0275866405466969	0.41364
3b-hydroxy-5-cholenoic acid.Subgroup.12	-0.0501934020277616	0.0270792183522416	0.0637998
3b-hydroxy-5-cholenoic acid.Subgroup.13	-0.0300784273470945	0.0283255703427742	0.288289
3b-hydroxy-5-cholenoic acid.Subgroup.14	-0.0766637099607935	0.0273308793016926	0.00503132
3b-hydroxy-5-cholenoic acid.Subgroup.15	-0.0307224785239846	0.0287253486192343	0.284833
3b-hydroxy-5-cholenoic acid.Subgroup.16	-0.0983573818139947	0.0284031100849814	0.000534369
3b-hydroxy-5-cholenoic acid.Subgroup.17	-0.0306508468260423	0.0278169388702588	0.270515
3b-hydroxy-5-cholenoic acid.Subgroup.18	-0.0143154712738839	0.0271797006831827	0.598404
3b-hydroxy-5-cholenoic acid.Subgroup.19	0.00924385323474805	0.0276539520822163	0.738177
3b-hydroxy-5-cholenoic acid.Subgroup.20	-0.0248351065965035	0.0250901924627026	0.322256
Metabolite	Estimate	Std. Error	Pr(>|z|)
6-oxolithocholate.Subgroup.1	0.0551660219700673	0.0254699248519531	0.0303167
6-oxolithocholate.Subgroup.2	0.0330089999415494	0.0270741083144591	0.222765
6-oxolithocholate.Subgroup.3	0.0135434695749204	0.0277235013311721	0.625182
6-oxolithocholate.Subgroup.4	-0.0135546175642076	0.027455241072737	0.621519
6-oxolithocholate.Subgroup.5	0.00185683990986062	0.0245170648870983	0.939629
6-oxolithocholate.Subgroup.6	-0.0503428350231758	0.0287482152156973	0.0799177
6-oxolithocholate.Subgroup.7	0.00025388994599731	0.0253445351992062	0.992007
6-oxolithocholate.Subgroup.8	-0.00471976088026596	0.0279160451201041	0.865742
6-oxolithocholate.Subgroup.9	0.0681158362068787	0.0261337862098157	0.0091492
6-oxolithocholate.Subgroup.10	0.0270441975320434	0.0267595663847856	0.31219
6-oxolithocholate.Subgroup.11	0.0716239717368343	0.0274981681581936	0.00919597
6-oxolithocholate.Subgroup.12	-0.0283828215760894	0.0280716119198329	0.311975
6-oxolithocholate.Subgroup.13	-0.0636933863887088	0.0266191582923501	0.016722
6-oxolithocholate.Subgroup.14	-0.00315582106589747	0.0272666454994791	0.907859
6-oxolithocholate.Subgroup.15	0.00482421234381607	0.0260698540534493	0.85319
6-oxolithocholate.Subgroup.16	-0.0529032216429663	0.0263553387858752	0.0447171
6-oxolithocholate.Subgroup.17	0.020793000981617	0.025908934380387	0.42224
6-oxolithocholate.Subgroup.18	-0.0169641039672549	0.0264970790340002	0.522026
6-oxolithocholate.Subgroup.19	-0.0172282276562212	0.0287272390989372	0.548695
6-oxolithocholate.Subgroup.20	0.0292841804498615	0.0265354358272123	0.269772
Metabolite	Estimate	Std. Error	Pr(>|z|)
7,12-diketolithocholate.Subgroup.1	-0.0964841211289109	0.0443558639963697	0.029613
7,12-diketolithocholate.Subgroup.2	-0.0176124741034106	0.0314945511498316	0.57601
7,12-diketolithocholate.Subgroup.3	-0.0229987763017287	0.0298966378910842	0.441729
7,12-diketolithocholate.Subgroup.4	0.0975339600467741	0.0253490088201846	0.000119259
7,12-diketolithocholate.Subgroup.5	-0.133685099097127	0.0536125207447836	0.0126475
7,12-diketolithocholate.Subgroup.6	0.112923619582365	0.0142786899619071	2.60421e-15
7,12-diketolithocholate.Subgroup.7	-0.0108012389568044	0.0209818766896673	0.6067
7,12-diketolithocholate.Subgroup.8	-0.00564149319557099	0.0309273449869341	0.85526
7,12-diketolithocholate.Subgroup.9	-0.0320067015645735	0.0336820263786324	0.34198
7,12-diketolithocholate.Subgroup.10	-0.0637213188982445	0.0416989878626082	0.126481
7,12-diketolithocholate.Subgroup.11	-0.0335888116282632	0.0360016005142795	0.35083
7,12-diketolithocholate.Subgroup.12	0.0140256830400654	0.0204556455897701	0.492926
7,12-diketolithocholate.Subgroup.13	0.0960049550516464	0.014933159900285	1.28465e-10
7,12-diketolithocholate.Subgroup.14	-0.118594537302851	0.0511109361918503	0.0203227
7,12-diketolithocholate.Subgroup.15	-0.0217036785171763	0.0318316954889953	0.495349
7,12-diketolithocholate.Subgroup.16	-0.247217122044929	0.0597325936451256	3.49233e-05
7,12-diketolithocholate.Subgroup.17	-0.0293659257086904	0.0348804902397806	0.399843
7,12-diketolithocholate.Subgroup.18	-0.0573284682008303	0.0440069393916258	0.192672
7,12-diketolithocholate.Subgroup.19	0.0185094016485768	0.0308968857753716	0.549126
7,12-diketolithocholate.Subgroup.20	-0.154626784530728	0.0544043666009483	0.00448067
Metabolite	Estimate	Std. Error	Pr(>|z|)
7-ketodeoxycholate.Subgroup.1	-0.144683743309802	0.037417229454959	0.000110287
7-ketodeoxycholate.Subgroup.2	-0.0340746884735537	0.0305531714352511	0.26474
7-ketodeoxycholate.Subgroup.3	-0.032900727597676	0.0287646014366022	0.25271
7-ketodeoxycholate.Subgroup.4	0.0231092193842328	0.0302105313014107	0.444308
7-ketodeoxycholate.Subgroup.5	-0.151304431921547	0.0367575505918441	3.85034e-05
7-ketodeoxycholate.Subgroup.6	0.159264193740087	0.0170024755289999	7.45401e-21
7-ketodeoxycholate.Subgroup.7	-0.0476930467829151	0.0267186971787603	0.0742603
7-ketodeoxycholate.Subgroup.8	-0.00494021104720811	0.0293662688753179	0.866404
7-ketodeoxycholate.Subgroup.9	-0.030643995064305	0.0306919851602261	0.318068
7-ketodeoxycholate.Subgroup.10	-0.0696383176201378	0.0329675107294939	0.034658
7-ketodeoxycholate.Subgroup.11	-0.0406082594240021	0.0306777876265598	0.185602
7-ketodeoxycholate.Subgroup.12	0.0381090466044117	0.0233529205901324	0.102706
7-ketodeoxycholate.Subgroup.13	0.0960358397985143	0.0198376018294754	1.29122e-06
7-ketodeoxycholate.Subgroup.14	-0.124037958500445	0.0370062237664062	0.000802841
7-ketodeoxycholate.Subgroup.15	-0.020451618418433	0.0305509702373407	0.503224
7-ketodeoxycholate.Subgroup.16	-0.147082555416076	0.0383202839283461	0.000123918
7-ketodeoxycholate.Subgroup.17	-0.0405393835310642	0.0335773133958255	0.2273
7-ketodeoxycholate.Subgroup.18	-0.0784397138540699	0.0331678854790003	0.0180335
7-ketodeoxycholate.Subgroup.19	0.0127415236188029	0.0261356926867292	0.625894
7-ketodeoxycholate.Subgroup.20	-0.149813673321678	0.0394804142552101	0.000147862
Metabolite	Estimate	Std. Error	Pr(>|z|)
dehydrolithocholate.Subgroup.1	0.136085082060759	0.0242307052700514	1.95175e-08
dehydrolithocholate.Subgroup.2	0.0125486096847753	0.0277280656603716	0.650866
dehydrolithocholate.Subgroup.3	0.0257372414405838	0.0274361075983148	0.348204
dehydrolithocholate.Subgroup.4	0.00941148357570743	0.0277478922543071	0.734475
dehydrolithocholate.Subgroup.5	-0.0758823884638767	0.0263475932373517	0.00397612
dehydrolithocholate.Subgroup.6	-0.0296563251585814	0.0269763844557491	0.271618
dehydrolithocholate.Subgroup.7	-0.0557322186366351	0.0267555590818859	0.0372499
dehydrolithocholate.Subgroup.8	-0.00251206026143888	0.0280246136408545	0.928575
dehydrolithocholate.Subgroup.9	0.04463273134393	0.0276947747814414	0.10705
dehydrolithocholate.Subgroup.10	0.0295520684342948	0.0274783639141514	0.282166
dehydrolithocholate.Subgroup.11	0.0234263335152184	0.027392758319731	0.392439
dehydrolithocholate.Subgroup.12	-0.0291411524932201	0.0260372491244683	0.263051
dehydrolithocholate.Subgroup.13	-0.0225852933195354	0.0257066637471686	0.37963
dehydrolithocholate.Subgroup.14	0.0472130961498385	0.0267696825534296	0.0777862
dehydrolithocholate.Subgroup.15	0.0245670172744477	0.0274916428614276	0.371526
dehydrolithocholate.Subgroup.16	-0.058791772132138	0.0256037831862405	0.0216636
dehydrolithocholate.Subgroup.17	0.0629967644676245	0.0277929466843107	0.0234119
dehydrolithocholate.Subgroup.18	0.0835778598678394	0.0249373575660373	0.000803715
dehydrolithocholate.Subgroup.19	0.000152375623429369	0.0278303668385746	0.995631
dehydrolithocholate.Subgroup.20	0.164795521229985	0.0243975826098976	1.43246e-11
Metabolite	Estimate	Std. Error	Pr(>|z|)
deoxycholate.Subgroup.1	-0.0164586177992332	0.0287203683679579	0.566601
deoxycholate.Subgroup.2	-0.0238144921424212	0.030881879510211	0.440619
deoxycholate.Subgroup.3	0.0256860570297032	0.0251623832317748	0.307344
deoxycholate.Subgroup.4	-0.00304819459565498	0.0271502949283688	0.910608
deoxycholate.Subgroup.5	-0.193030746094463	0.0353431495556696	4.71817e-08
deoxycholate.Subgroup.6	0.0620499863310335	0.0215569858236787	0.00399677
deoxycholate.Subgroup.7	-0.00980532161047795	0.0291938369790758	0.736969
deoxycholate.Subgroup.8	-0.0212068355906523	0.0294214203869329	0.471035
deoxycholate.Subgroup.9	-0.0147385270680928	0.0266358527132801	0.580035
deoxycholate.Subgroup.10	-0.0132033791689366	0.0281397300636141	0.638921
deoxycholate.Subgroup.11	-0.0442133853616809	0.0298264685477292	0.138246
deoxycholate.Subgroup.12	-0.00406203677046295	0.0247510593652346	0.86964
deoxycholate.Subgroup.13	0.0628558029168223	0.0221259571904068	0.00449981
deoxycholate.Subgroup.14	-0.192094703244621	0.0379803947504796	4.24269e-07
deoxycholate.Subgroup.15	0.0161618268451886	0.0316898564355322	0.610051
deoxycholate.Subgroup.16	-0.173820337797984	0.0330656370777876	1.46562e-07
deoxycholate.Subgroup.17	-0.00725399532276411	0.0292817313326888	0.804342
deoxycholate.Subgroup.18	-0.0113792777803188	0.0272776143615185	0.676557
deoxycholate.Subgroup.19	0.0177968848106352	0.0275705804615307	0.518601
deoxycholate.Subgroup.20	-0.13821681740629	0.0345967298963688	6.46715e-05
Metabolite	Estimate	Std. Error	Pr(>|z|)
glycodeoxycholate.Subgroup.1	-0.0198682030758235	0.0238645117465878	0.405103
glycodeoxycholate.Subgroup.2	-0.0102035473153506	0.0288752735381981	0.723814
glycodeoxycholate.Subgroup.3	0.00302786075016979	0.0300493302354445	0.919739
glycodeoxycholate.Subgroup.4	0.00726045571255773	0.0275054430075555	0.791807
glycodeoxycholate.Subgroup.5	-0.0535986423245416	0.0300718772314366	0.074692
glycodeoxycholate.Subgroup.6	0.0400428485665674	0.0198817100687645	0.0440038
glycodeoxycholate.Subgroup.7	-0.0143574184306701	0.0258196790216952	0.578166
glycodeoxycholate.Subgroup.8	-0.003418885172242	0.0282639006212123	0.90372
glycodeoxycholate.Subgroup.9	-0.0064814216589885	0.0281679300320086	0.818015
glycodeoxycholate.Subgroup.10	-0.0224093188615635	0.0307732109842045	0.466486
glycodeoxycholate.Subgroup.11	-0.0236775274991909	0.031473630929662	0.451872
glycodeoxycholate.Subgroup.12	0.0188802318448717	0.0259963536732406	0.467677
glycodeoxycholate.Subgroup.13	0.0288501713138082	0.0206975608614921	0.16335
glycodeoxycholate.Subgroup.14	-0.0295827232727544	0.0337074761335006	0.380144
glycodeoxycholate.Subgroup.15	-7.63049206726422e-05	0.02837095838283	0.997854
glycodeoxycholate.Subgroup.16	-0.0756364718260131	0.0331247603004642	0.0224079
glycodeoxycholate.Subgroup.17	-0.0245305393414914	0.0298116049956259	0.410592
glycodeoxycholate.Subgroup.18	-0.0424365357167908	0.0315830895529898	0.179062
glycodeoxycholate.Subgroup.19	0.00345749516962469	0.026434952654699	0.895939
glycodeoxycholate.Subgroup.20	-0.0662987753213177	0.0363358512783935	0.0680598
Metabolite	Estimate	Std. Error	Pr(>|z|)
glycoursodeoxycholate.Subgroup.1	-0.0783463942520243	0.0298275272839957	0.00862307
glycoursodeoxycholate.Subgroup.2	-0.0216601162223449	0.0288129751938825	0.452202
glycoursodeoxycholate.Subgroup.3	-0.0153125334375907	0.0269047583294042	0.569262
glycoursodeoxycholate.Subgroup.4	0.0175064252130838	0.0270146884125258	0.516963
glycoursodeoxycholate.Subgroup.5	-0.0111083036555111	0.0268200424007567	0.678743
glycoursodeoxycholate.Subgroup.6	0.0714952662257259	0.0239192719450417	0.00279871
glycoursodeoxycholate.Subgroup.7	-0.0195766067806313	0.0246750804864483	0.427559
glycoursodeoxycholate.Subgroup.8	-0.00742951544865245	0.0280213809853085	0.790904
glycoursodeoxycholate.Subgroup.9	-0.0288342241550287	0.0282604177658279	0.307584
glycoursodeoxycholate.Subgroup.10	-0.0541245101047351	0.0290586959206809	0.0625196
glycoursodeoxycholate.Subgroup.11	-0.0320626146611967	0.0301187708925011	0.287084
glycoursodeoxycholate.Subgroup.12	0.0508105829986303	0.0236177057263548	0.0314465
glycoursodeoxycholate.Subgroup.13	0.0498734585593379	0.0237359145112619	0.0356251
glycoursodeoxycholate.Subgroup.14	-0.0888087420980402	0.0314383486434208	0.00473022
glycoursodeoxycholate.Subgroup.15	-0.0102516045933299	0.0288515225315354	0.722348
glycoursodeoxycholate.Subgroup.16	-0.0401062942247629	0.0308043938228864	0.192928
glycoursodeoxycholate.Subgroup.17	-0.0326685943657891	0.0295122200761554	0.268315
glycoursodeoxycholate.Subgroup.18	-0.0708337750350494	0.0303587634604321	0.0196364
glycoursodeoxycholate.Subgroup.19	0.00893699146415472	0.0274348382199052	0.744611
glycoursodeoxycholate.Subgroup.20	-0.107940363511713	0.0322452254102661	0.000815488
Metabolite	Estimate	Std. Error	Pr(>|z|)
hyocholate.Subgroup.1	-0.186760336489494	0.0334010624283231	2.25182e-08
hyocholate.Subgroup.2	-0.0445594869483125	0.0301472186588938	0.139391
hyocholate.Subgroup.3	-0.000314699477744435	0.0263616318597849	0.990475
hyocholate.Subgroup.4	-0.00647232272362728	0.0277955530337661	0.815874
hyocholate.Subgroup.5	-0.154871273852711	0.0318710242851462	1.17794e-06
hyocholate.Subgroup.6	0.180997129801132	0.0220893569807893	2.52976e-16
hyocholate.Subgroup.7	-0.004599503504734	0.0287236795132005	0.872779
hyocholate.Subgroup.8	-0.0180053388869591	0.0295326563776941	0.542077
hyocholate.Subgroup.9	-0.0282099900910789	0.0284400354591033	0.321241
hyocholate.Subgroup.10	-0.0672502919797651	0.0319364482227758	0.0352258
hyocholate.Subgroup.11	-0.0514376018465491	0.0301942731938668	0.0884643
hyocholate.Subgroup.12	0.0915527502125984	0.0237758317319969	0.000117798
hyocholate.Subgroup.13	0.0854057701926682	0.0219643897448975	0.000100918
hyocholate.Subgroup.14	-0.189658211716621	0.0359510181055499	1.32422e-07
hyocholate.Subgroup.15	-0.0343884860454677	0.0286623405386869	0.230225
hyocholate.Subgroup.16	-0.217669446929547	0.0348404459953403	4.16786e-10
hyocholate.Subgroup.17	-0.0677104042149466	0.0310296052478628	0.0291005
hyocholate.Subgroup.18	-0.119515845368821	0.0338115175168633	0.000408134
hyocholate.Subgroup.19	0.0254466058045922	0.0290741033791594	0.381447
hyocholate.Subgroup.20	-0.239025100847477	0.0372441868280145	1.38273e-10
Metabolite	Estimate	Std. Error	Pr(>|z|)
isoursodeoxycholate.Subgroup.1	-0.154290829005478	0.0325196612965886	2.08981e-06
isoursodeoxycholate.Subgroup.2	-0.0409367284844487	0.0296180817122511	0.166925
isoursodeoxycholate.Subgroup.3	-0.0105651829099749	0.0279985624646161	0.705915
isoursodeoxycholate.Subgroup.4	-0.00323110105449221	0.0274954920200489	0.906453
isoursodeoxycholate.Subgroup.5	-0.149069349887546	0.0314266788297801	2.10159e-06
isoursodeoxycholate.Subgroup.6	0.165541607534637	0.021445713727589	1.17154e-14
isoursodeoxycholate.Subgroup.7	-0.0296384465370054	0.0267745680499569	0.26831
isoursodeoxycholate.Subgroup.8	-0.0149870753067027	0.0294360142695946	0.610654
isoursodeoxycholate.Subgroup.9	-0.0410834241379594	0.0298056002080424	0.168086
isoursodeoxycholate.Subgroup.10	-0.0733252315905065	0.0306436166311703	0.0167186
isoursodeoxycholate.Subgroup.11	-0.0541069458957679	0.0300356331022023	0.0716359
isoursodeoxycholate.Subgroup.12	0.0414646844125731	0.0244280775275363	0.0896175
isoursodeoxycholate.Subgroup.13	0.0588715974678453	0.023231311459839	0.0112721
isoursodeoxycholate.Subgroup.14	-0.161264295482303	0.0358178520298282	6.7208e-06
isoursodeoxycholate.Subgroup.15	-0.0387201525009948	0.028275195874951	0.170873
isoursodeoxycholate.Subgroup.16	-0.175536254870542	0.0353984322788663	7.09041e-07
isoursodeoxycholate.Subgroup.17	-0.0562552836723879	0.0304017040635472	0.0642561
isoursodeoxycholate.Subgroup.18	-0.0763745849942534	0.031731863825735	0.0160897
isoursodeoxycholate.Subgroup.19	0.0283698088472365	0.0280306368435135	0.31149
isoursodeoxycholate.Subgroup.20	-0.204368893432272	0.038750047930723	1.3346e-07
Metabolite	Estimate	Std. Error	Pr(>|z|)
lithocholate.Subgroup.1	0.0273323850962935	0.0258561068238208	0.290468
lithocholate.Subgroup.2	-0.0078220653568781	0.0286558333758688	0.784879
lithocholate.Subgroup.3	0.0344351400989529	0.0256466050114028	0.179376
lithocholate.Subgroup.4	-0.00594051597201622	0.0273216644747551	0.827874
lithocholate.Subgroup.5	-0.11746756949364	0.0302328740796905	0.000102151
lithocholate.Subgroup.6	0.0398797735053813	0.0273963168502869	0.145486
lithocholate.Subgroup.7	0.000225449062212626	0.0265886210211872	0.993235
lithocholate.Subgroup.8	-0.0111256643332315	0.0283590512052494	0.694826
lithocholate.Subgroup.9	0.0125150880692264	0.026221841373087	0.633165
lithocholate.Subgroup.10	0.0122505280535072	0.0262179515436111	0.640316
lithocholate.Subgroup.11	-0.0242743887580745	0.0285593917241966	0.395346
lithocholate.Subgroup.12	-0.00451106178380579	0.0261255206239059	0.862912
lithocholate.Subgroup.13	0.0470349389031438	0.0257721233713426	0.0679963
lithocholate.Subgroup.14	-0.0948522850091221	0.031383463097056	0.00250808
lithocholate.Subgroup.15	0.0187068706759829	0.0260040000485863	0.471904
lithocholate.Subgroup.16	-0.101590636289406	0.0276232991784906	0.000235332
lithocholate.Subgroup.17	-0.00259546232429932	0.0271414996857163	0.923817
lithocholate.Subgroup.18	-0.0093243578732305	0.026275744481358	0.72269
lithocholate.Subgroup.19	0.0151452210713438	0.0273543742657082	0.579807
lithocholate.Subgroup.20	-0.0467068892069417	0.0277346557636059	0.0921696
Metabolite	Estimate	Std. Error	Pr(>|z|)
ursocholate.Subgroup.1	-0.149212514898464	0.0349599066344975	1.97141e-05
ursocholate.Subgroup.2	-0.0235996568105242	0.0295733093430247	0.424867
ursocholate.Subgroup.3	0.0161729404003038	0.027034657005177	0.549687
ursocholate.Subgroup.4	-0.00963092149911364	0.027890248548824	0.729858
ursocholate.Subgroup.5	-0.168956423986594	0.0347239868122078	1.14054e-06
ursocholate.Subgroup.6	0.225892197889409	0.0199268916155414	8.69847e-30
ursocholate.Subgroup.7	-0.057863465789319	0.0279674435167534	0.03855
ursocholate.Subgroup.8	0.00263564489395818	0.0293956198005835	0.928556
ursocholate.Subgroup.9	-0.0189721750296762	0.0305794195837293	0.534979
ursocholate.Subgroup.10	-0.0554887512723145	0.0307807819103808	0.0714341
ursocholate.Subgroup.11	-0.0377117409396443	0.0300240726558215	0.209098
ursocholate.Subgroup.12	0.0828172824649918	0.0224726985091942	0.000228487
ursocholate.Subgroup.13	0.153108449534166	0.0199007614403733	1.43055e-14
ursocholate.Subgroup.14	-0.127273798959663	0.0355596640760405	0.000344698
ursocholate.Subgroup.15	-0.00634082073621755	0.0272821205200879	0.816214
ursocholate.Subgroup.16	-0.178132263309822	0.0370838890453238	1.5592e-06
ursocholate.Subgroup.17	-0.0428967681361924	0.0301400846508421	0.154665
ursocholate.Subgroup.18	-0.0518729375482911	0.0313384584386174	0.0978741
ursocholate.Subgroup.19	0.0555671804706791	0.0260145808580564	0.0326793
ursocholate.Subgroup.20	-0.153847982669648	0.0379606851585852	5.0603e-05
Metabolite	Estimate	Std. Error	Pr(>|z|)
ursodeoxycholate.Subgroup.1	-0.174769703672452	0.033133762710289	1.32994e-07
ursodeoxycholate.Subgroup.2	-0.0457214996478424	0.0300713860231633	0.128402
ursodeoxycholate.Subgroup.3	-0.0143742092234232	0.0261922230300683	0.583145
ursodeoxycholate.Subgroup.4	-0.00248428566263834	0.0293691660768154	0.932589
ursodeoxycholate.Subgroup.5	-0.177217140482124	0.0328617765783581	6.93664e-08
ursodeoxycholate.Subgroup.6	0.147575615545256	0.0189359744079032	6.52299e-15
ursodeoxycholate.Subgroup.7	-0.0415176019881459	0.0283045438700192	0.142426
ursodeoxycholate.Subgroup.8	-0.0154445462350845	0.0292714175879171	0.597755
ursodeoxycholate.Subgroup.9	-0.0403520587856585	0.0295423845454731	0.171969
ursodeoxycholate.Subgroup.10	-0.0745293801235807	0.0315466812303657	0.0181516
ursodeoxycholate.Subgroup.11	-0.05790073263719	0.0304849961222078	0.0575225
ursodeoxycholate.Subgroup.12	0.0509082945856616	0.0240832893344812	0.0345287
ursodeoxycholate.Subgroup.13	0.0623720156581739	0.0207632292853785	0.00266486
ursodeoxycholate.Subgroup.14	-0.173070262160551	0.0358486827727124	1.3805e-06
ursodeoxycholate.Subgroup.15	-0.0233185900944446	0.0288365928539455	0.418719
ursodeoxycholate.Subgroup.16	-0.191672319255505	0.0346468871158506	3.16301e-08
ursodeoxycholate.Subgroup.17	-0.0581269065766195	0.0310400516549479	0.0611178
ursodeoxycholate.Subgroup.18	-0.0832174156459988	0.0323139775470828	0.010016
ursodeoxycholate.Subgroup.19	0.0259728366854902	0.0265710693758338	0.328329
ursodeoxycholate.Subgroup.20	-0.202044837482956	0.037246627369246	5.81126e-08
