# Supplementary material for: Fecal Bile Acids and Neutral Sterols Are Associated with Latent Microbial Subgroups in the Human Gut
Source: Metabolites. 2022 Sep 8;12(9):846. doi: 10.3390/metabo12090846 (PMC9504437; doi:10.3390/metabo12090846)
Supplement: Supplementary file 1 [file metabolites-12-00846-s001.zip › Supplementary Tables S5-S8.xlsx]

## Sheet: Animal sterols
Table S5: Results of the Dirichlet regression models for the association between fecal animal sterols and microbial subgroups, additionally adjusted for total energy, fiber, and alcohol intake
Metabolite	Estimate	Std. Error	Pr(>|z|)
cholesterol.Subgroup.1	-0.157225372958131	0.0360554574419085	1.29674e-05		P-values:
cholesterol.Subgroup.2	-0.054464431115452	0.0346221721060066	0.115694		Unadjusted <0.05
cholesterol.Subgroup.3	-0.0217143504409407	0.0331103744374266	0.511942		Adjusted <0.00208
cholesterol.Subgroup.4	-0.00824512289793837	0.0328965290398614	0.802094
cholesterol.Subgroup.5	-0.099721335432356	0.0327710531193336	0.00234256		Subgroup_matrix ~ x + age + sex + education + waist circumference + physical activity + energy intake + fiber + alcohol
cholesterol.Subgroup.6	0.229116846347013	0.0292019784185012	4.29737e-15		n=930
cholesterol.Subgroup.7	0.00851330997518609	0.0327028258685723	0.794614
cholesterol.Subgroup.8	-0.0193849432896836	0.0341013031230766	0.569728
cholesterol.Subgroup.9	-0.0611714423245242	0.0336000019244862	0.0686709
cholesterol.Subgroup.10	-0.0957944785732629	0.0361939012712228	0.00812809
cholesterol.Subgroup.11	-0.0788312114977923	0.0347263963434176	0.0232036
cholesterol.Subgroup.12	0.0591378206456043	0.0310663695236189	0.0569628
cholesterol.Subgroup.13	0.14688258362453	0.0285344689201382	2.63912e-07
cholesterol.Subgroup.14	-0.221131381966967	0.038039045343255	6.12628e-09
cholesterol.Subgroup.15	-0.0316375368631241	0.0353256508253535	0.370468
cholesterol.Subgroup.16	-0.207371825278801	0.0370815272997053	2.24053e-08
cholesterol.Subgroup.17	-0.10185160034685	0.0349647549793603	0.00357999
cholesterol.Subgroup.18	-0.140218970897138	0.0384603591247244	0.000266556
cholesterol.Subgroup.19	0.0225023793377629	0.033243964801017	0.498478
cholesterol.Subgroup.20	-0.311671135381864	0.0410910833366378	3.32782e-14
Metabolite	Estimate	Std. Error	Pr(>|z|)
coprostanol.Subgroup.1	0.151959833479007	0.0276762265878729	4.0051e-08
coprostanol.Subgroup.2	0.0427053628367972	0.0312883415489852	0.172285
coprostanol.Subgroup.3	0.00538163617155092	0.03305691718976	0.870677
coprostanol.Subgroup.4	-0.000283728516205655	0.032247918827891	0.99298
coprostanol.Subgroup.5	-0.0021771048569135	0.0280493017962553	0.938133
coprostanol.Subgroup.6	-0.140119482422959	0.0374628038270962	0.000183852
coprostanol.Subgroup.7	-0.0907522058328818	0.0307262864968077	0.00314122
coprostanol.Subgroup.8	0.0282082277515066	0.0331134279270383	0.394288
coprostanol.Subgroup.9	0.0457220190813737	0.0311809333139693	0.142554
coprostanol.Subgroup.10	0.05896922328503	0.0291083581389436	0.04278
coprostanol.Subgroup.11	0.0465870041678382	0.029884012037093	0.119014
coprostanol.Subgroup.12	-0.0212157869417235	0.030111950329596	0.481082
coprostanol.Subgroup.13	-0.146228133868804	0.0343656412670909	2.08986e-05
coprostanol.Subgroup.14	0.132142702545695	0.0292392891368642	6.20286e-06
coprostanol.Subgroup.15	-0.00021451886797425	0.0320652909769873	0.994662
coprostanol.Subgroup.16	0.126183471760198	0.0276016675575406	4.8404e-06
coprostanol.Subgroup.17	0.0958505761463343	0.0303924477616414	0.0016118
coprostanol.Subgroup.18	0.156857543797269	0.0293670959957679	9.22984e-08
coprostanol.Subgroup.19	-0.00516114229685546	0.0345847862525781	0.881371
coprostanol.Subgroup.20	0.216750288093571	0.0234992534387892	2.86996e-20

## Sheet: Plant sterols
Table S6: Results of the Dirichlet regression models for the association between fecal plant sterols and microbial subgroups, additionally adjusted for total energy, fiber, and alcohol intake
microbiota subgroups, additionally adjusted for total energy, fiber, and alcohol intake	Estimate	Std. Error	Pr(>|z|)
stigmasterol.Subgroup.1	-0.0680768870296209	0.0311667597892219	0.0289418		P-values:
stigmasterol.Subgroup.2	-0.0334944382822184	0.0346937517167764	0.334329		Unadjusted <0.05
stigmasterol.Subgroup.3	-0.0420067762236306	0.0354759408749228	0.236377		Adjusted <0.00208
stigmasterol.Subgroup.4	-0.000504518420995652	0.0324770653230796	0.987606
stigmasterol.Subgroup.5	0.0299136642967626	0.0308521841587174	0.332256		Subgroup_matrix ~ x + age + sex + education + waist circumference + physical activity + energy intake + fiber + alcohol
stigmasterol.Subgroup.6	0.0663568536644669	0.026401588691121	0.0119585		n=930
stigmasterol.Subgroup.7	0.0652169755519492	0.0282635952397893	0.0210295
stigmasterol.Subgroup.8	-0.00319815613736404	0.0329623656527719	0.922707
stigmasterol.Subgroup.9	-0.0592767098926984	0.035763422292876	0.097425
stigmasterol.Subgroup.10	-0.0850797413232533	0.035220037346915	0.0157066
stigmasterol.Subgroup.11	-0.0524489590809248	0.0362916304179947	0.148399
stigmasterol.Subgroup.12	0.0226642058322441	0.0284187572629436	0.425156
stigmasterol.Subgroup.13	0.0950274475295666	0.0232664924385542	4.4209e-05
stigmasterol.Subgroup.14	-0.156307485989086	0.0358304881784269	1.28634e-05
stigmasterol.Subgroup.15	-0.0331120460452627	0.032850688551813	0.313476
stigmasterol.Subgroup.16	-0.0826223585468266	0.0318580759739281	0.00950181
stigmasterol.Subgroup.17	-0.0602885520193458	0.033624987916148	0.0729779
stigmasterol.Subgroup.18	-0.0836221890116386	0.0340602186875352	0.0140835
stigmasterol.Subgroup.19	-0.0152231191305149	0.0340143339460303	0.654478
stigmasterol.Subgroup.20	-0.230789945838358	0.0387604277015158	2.6124e-09
Metabolite	Estimate	Std. Error	Pr(>|z|)
sitostanol .Subgroup.1	0.118010755451329	0.0283927395135612	3.23343e-05
sitostanol .Subgroup.2	0.0288470877356982	0.0302845652438296	0.340826
sitostanol .Subgroup.3	0.00219038444289443	0.0329897052362369	0.947063
sitostanol .Subgroup.4	0.0182390365912079	0.0326083516775124	0.575932
sitostanol .Subgroup.5	0.0552888123825079	0.0294407393926601	0.0603853
sitostanol .Subgroup.6	-0.177174488528977	0.0379559214185219	3.04292e-06
sitostanol .Subgroup.7	-0.0758113749786573	0.0307515769451831	0.0136905
sitostanol .Subgroup.8	0.0208245881751443	0.032370180033417	0.520012
sitostanol .Subgroup.9	0.0503110298645776	0.031895910199467	0.114715
sitostanol .Subgroup.10	0.116345173972299	0.0312079919411595	0.000192962
sitostanol .Subgroup.11	0.0887640551894127	0.0319216487864623	0.00542443
sitostanol .Subgroup.12	0.0192985677422337	0.0322762194948378	0.549894
sitostanol .Subgroup.13	-0.132825560552397	0.0348128091444141	0.00013595
sitostanol .Subgroup.14	0.168578029441106	0.0267526482359235	2.95048e-10
sitostanol .Subgroup.15	0.0182148873030954	0.0319148177092658	0.56818
sitostanol .Subgroup.16	0.123279224147371	0.0262495983716575	2.64757e-06
sitostanol .Subgroup.17	0.0948762479976287	0.0298468183604731	0.001479
sitostanol .Subgroup.18	0.110452481461561	0.0293699903609869	0.000169421
sitostanol .Subgroup.19	-0.00987568602530811	0.0334501387586343	0.767814
sitostanol .Subgroup.20	0.306002692104232	0.0248633402920834	8.26585e-35
Metabolite	Estimate	Std. Error	Pr(>|z|)
beta-sitosterol.Subgroup.1	-0.121627710444357	0.0360114553417189	0.000731552
beta-sitosterol.Subgroup.2	-0.0406424122731269	0.035657328127363	0.254367
beta-sitosterol.Subgroup.3	-0.0129319159444631	0.0365330419122114	0.723355
beta-sitosterol.Subgroup.4	0.00691431710297599	0.0336676273007556	0.837283
beta-sitosterol.Subgroup.5	-0.0185836819352073	0.0304366302477145	0.541485
beta-sitosterol.Subgroup.6	0.0618146699350246	0.0249155735325109	0.0131027
beta-sitosterol.Subgroup.7	0.0637844880938343	0.0284123198894052	0.0247708
beta-sitosterol.Subgroup.8	-0.00931530146345319	0.0332714095159141	0.779493
beta-sitosterol.Subgroup.9	-0.0437675674319331	0.0363502705948464	0.22857
beta-sitosterol.Subgroup.10	-0.0793981389834494	0.0382421799462107	0.0378761
beta-sitosterol.Subgroup.11	-0.0513862485494879	0.0362120590405306	0.155888
beta-sitosterol.Subgroup.12	0.00596935331127732	0.0280267465099642	0.831337
beta-sitosterol.Subgroup.13	0.0937188056010179	0.0226307596648238	3.45473e-05
beta-sitosterol.Subgroup.14	-0.168924229991268	0.0383461728775359	1.05665e-05
beta-sitosterol.Subgroup.15	-0.034694059223631	0.0348302057514906	0.319206
beta-sitosterol.Subgroup.16	-0.162556945664713	0.0353786098866403	4.33205e-06
beta-sitosterol.Subgroup.17	-0.0658983169958943	0.0362789714340578	0.069304
beta-sitosterol.Subgroup.18	-0.168522728641071	0.0380846221495382	9.64625e-06
beta-sitosterol.Subgroup.19	-0.0176204380434419	0.0332179456225201	0.5958
beta-sitosterol.Subgroup.20	-0.289722398968819	0.0425046562274211	9.34471e-12
Metabolite	Estimate	Std. Error	Pr(>|z|)
campesterol.Subgroup.1	-0.108145092259136	0.0361323394554491	0.00276225
campesterol.Subgroup.2	-0.0340492656085001	0.0368132071208235	0.355008
campesterol.Subgroup.3	0.0138074181888018	0.0375720537813044	0.713252
campesterol.Subgroup.4	0.00196044164551684	0.0323070824591207	0.951613
campesterol.Subgroup.5	-0.0397636393797967	0.0310228365767658	0.199929
campesterol.Subgroup.6	0.0671334800446409	0.0251135545135389	0.00751321
campesterol.Subgroup.7	0.0329944549827289	0.0288739999177805	0.253161
campesterol.Subgroup.8	-0.0123913889730232	0.0339563832948477	0.715171
campesterol.Subgroup.9	-0.0482776536354746	0.0344663712191977	0.161299
campesterol.Subgroup.10	-0.0717236704610232	0.0376511271618225	0.056786
campesterol.Subgroup.11	-0.0648116148519609	0.0350790453669216	0.064662
campesterol.Subgroup.12	-0.000897522772774646	0.0267369411100621	0.973221
campesterol.Subgroup.13	0.104492156666958	0.0223898522598355	3.05715e-06
campesterol.Subgroup.14	-0.172401312987538	0.0391434683936633	1.06104e-05
campesterol.Subgroup.15	-0.0283304847285939	0.0357639938066321	0.428273
campesterol.Subgroup.16	-0.153571448574999	0.0346761406442461	9.47873e-06
campesterol.Subgroup.17	-0.0645134177054923	0.0365025655570901	0.0771668
campesterol.Subgroup.18	-0.144629937929537	0.0377310345527853	0.000126496
campesterol.Subgroup.19	0.00191784945134059	0.0333204768288427	0.954101
campesterol.Subgroup.20	-0.268474587054105	0.042391956293203	2.40207e-10
Metabolite	Estimate	Std. Error	Pr(>|z|)
ergosterol.Subgroup.1	-0.0122245396399029	0.0311288349436098	0.694535
ergosterol.Subgroup.2	0.0439915581397717	0.0343220638107836	0.199938
ergosterol.Subgroup.3	0.005923647318443	0.032571408968481	0.855688
ergosterol.Subgroup.4	0.0135355228427927	0.0309990998836311	0.662371
ergosterol.Subgroup.5	0.0145027096386751	0.0274808312257047	0.59768
ergosterol.Subgroup.6	-0.00910320722729148	0.0273971631172175	0.739687
ergosterol.Subgroup.7	0.0324650408983451	0.027319866762284	0.234703
ergosterol.Subgroup.8	-0.00362436764928271	0.0321062618822618	0.91012
ergosterol.Subgroup.9	0.0107057560723213	0.0329127173113212	0.744971
ergosterol.Subgroup.10	-0.00755949978933926	0.0305755500803528	0.804722
ergosterol.Subgroup.11	0.0417727590819924	0.0445325427992087	0.34823
ergosterol.Subgroup.12	0.0103249728375984	0.0287608182537164	0.719599
ergosterol.Subgroup.13	-0.0462135428861399	0.0295000180647435	0.117218
ergosterol.Subgroup.14	0.0718206911003064	0.0405488039073853	0.0765248
ergosterol.Subgroup.15	-0.0148289078011185	0.0324656722734799	0.647846
ergosterol.Subgroup.16	-0.0149733215811468	0.0396544037780784	0.705731
ergosterol.Subgroup.17	0.0310557843319469	0.0328754959012045	0.344838
ergosterol.Subgroup.18	-0.0475881064889672	0.0422301074746023	0.259795
ergosterol.Subgroup.19	-0.0267190079061399	0.0324245485676439	0.409919
ergosterol.Subgroup.20	0.00557886433704414	0.0437368477156867	0.898501

## Sheet: Primary bile acids
Table S7: Results of the Dirichlet regression models for the association between fecal primary bile acids and microbial subgroups, additionally adjusted for total energy, fiber, and alcohol intake
Metabolite	Estimate	Std. Error	Pr(>|z|)
cholate.Subgroup.1	-0.158242875562521	0.0402707851717077	8.5133e-05		P-values:
cholate.Subgroup.2	-0.0399362476475739	0.035834413534942	0.265079		Unadjusted <0.05
cholate.Subgroup.3	0.00677685603131159	0.0333177066442537	0.838822		Adjusted <0.00208
cholate.Subgroup.4	0.00419009031311372	0.036713019386113	0.909134
cholate.Subgroup.5	-0.15197030993027	0.0390507027430415	9.95791e-05		Subgroup_matrix ~ x + age + sex + education + waist circumference + physical activity + energy intake + fiber + alcohol
cholate.Subgroup.6	0.132899617421411	0.0246941059690629	7.37301e-08		n=930
cholate.Subgroup.7	-0.108654566514288	0.0339249766055515	0.00136103
cholate.Subgroup.8	-0.00891975357641261	0.0337779345186022	0.791726
cholate.Subgroup.9	-0.0230382618554736	0.0340315501865065	0.498426
cholate.Subgroup.10	-0.0653921598401666	0.0354195118289856	0.0648605
cholate.Subgroup.11	-0.0346032564246115	0.0353721905317232	0.327945
cholate.Subgroup.12	0.0464732611688473	0.0266988944251822	0.0817461
cholate.Subgroup.13	0.064670049509566	0.0235229574633424	0.00597352
cholate.Subgroup.14	-0.0924229375154758	0.0384083418630278	0.0161139
cholate.Subgroup.15	-0.0207272322948694	0.0339935333693934	0.542034
cholate.Subgroup.16	-0.122400499678017	0.0400199680289823	0.00222459
cholate.Subgroup.17	-0.0611015346364787	0.0362010539333021	0.0914422
cholate.Subgroup.18	-0.0893598505460495	0.0397989112517562	0.0247499
cholate.Subgroup.19	0.0490232630822543	0.0350123107156264	0.161462
cholate.Subgroup.20	-0.115517001161547	0.0402717697770326	0.00412506
Metabolite	Estimate	Std. Error	Pr(>|z|)
glycochenodeoxycholate.Subgroup.1	-0.0375473052947108	0.0397000765885927	0.344264
glycochenodeoxycholate.Subgroup.2	-0.019182563012355	0.0330075872074826	0.561135
glycochenodeoxycholate.Subgroup.3	-0.00453186693348372	0.030436557616615	0.881636
glycochenodeoxycholate.Subgroup.4	-0.000265720312730098	0.0319972243603562	0.993374
glycochenodeoxycholate.Subgroup.5	-0.00206139247820731	0.0343086292804522	0.952089
glycochenodeoxycholate.Subgroup.6	0.0847049254295494	0.027039632064527	0.00173253
glycochenodeoxycholate.Subgroup.7	-0.0157222908312408	0.0335816200742297	0.639655
glycochenodeoxycholate.Subgroup.8	0.00481256780593946	0.0322391855690682	0.881335
glycochenodeoxycholate.Subgroup.9	-0.0159315006721415	0.033716290813161	0.636558
glycochenodeoxycholate.Subgroup.10	-0.0294642263086937	0.0357511151778047	0.409855
glycochenodeoxycholate.Subgroup.11	-0.030168292867678	0.0337466809435975	0.371342
glycochenodeoxycholate.Subgroup.12	0.026881138521148	0.029120892815856	0.355961
glycochenodeoxycholate.Subgroup.13	0.0781831832079936	0.0230555035544122	0.000696164
glycochenodeoxycholate.Subgroup.14	0.000269276464915176	0.0402377531056256	0.99466
glycochenodeoxycholate.Subgroup.15	-0.0121883391325319	0.032231388380425	0.705318
glycochenodeoxycholate.Subgroup.16	-0.0288371657896235	0.0393431107741058	0.463579
glycochenodeoxycholate.Subgroup.17	-0.0178678631226465	0.0358709377698418	0.618403
glycochenodeoxycholate.Subgroup.18	-0.0905897556157679	0.0409339503121165	0.0268927
glycochenodeoxycholate.Subgroup.19	-0.00116414924085676	0.0300859109208511	0.969134
glycochenodeoxycholate.Subgroup.20	-0.101468723505	0.0411380569104462	0.0136425
Metabolite	Estimate	Std. Error	Pr(>|z|)
glycocholate.Subgroup.1	-0.0255946774399366	0.0380798184992791	0.501499
glycocholate.Subgroup.2	-0.00433108760831874	0.0338406584262858	0.898161
glycocholate.Subgroup.3	-0.0109111828941744	0.0310363233759171	0.725167
glycocholate.Subgroup.4	0.000804503717932526	0.0318570503138516	0.979853
glycocholate.Subgroup.5	0.00865222087875927	0.0309622040305178	0.779904
glycocholate.Subgroup.6	0.0247264018163525	0.0276662699423176	0.371462
glycocholate.Subgroup.7	0.00406365815621238	0.0284881060283078	0.886571
glycocholate.Subgroup.8	0.00912823761259503	0.032003149666273	0.775468
glycocholate.Subgroup.9	-0.00435063058525159	0.0324523559579569	0.893353
glycocholate.Subgroup.10	-0.0374157162882483	0.0329668768545008	0.256397
glycocholate.Subgroup.11	-0.0298821870880595	0.0339445930152218	0.378685
glycocholate.Subgroup.12	0.0445399646987138	0.0295462886611171	0.131692
glycocholate.Subgroup.13	0.0625442446950781	0.024599894030484	0.0110075
glycocholate.Subgroup.14	-0.0390225069662988	0.0347188027510602	0.26103
glycocholate.Subgroup.15	-0.0137335917491876	0.0334293025163001	0.681201
glycocholate.Subgroup.16	-0.0236377786223907	0.0380451314605392	0.534396
glycocholate.Subgroup.17	-0.0113196659952743	0.0374226436369089	0.762285
glycocholate.Subgroup.18	-0.100383679009953	0.0422230773131235	0.0174323
glycocholate.Subgroup.19	-0.000936265966652683	0.0334717118120529	0.977685
glycocholate.Subgroup.20	-0.115012238700162	0.041166327489772	0.00520858

## Sheet: Secondary bile acids
Table S8: Results of the Dirichlet regression models for the association between fecal secondary bile acids and microbial subgroups, additionally adjusted for total energy, fiber, and alcohol intake
Metabolite	Estimate	Std. Error	Pr(>|z|)
12-dehydrocholate.Subgroup.1	-0.139833643348203	0.0400818536993008	0.000485372		P-values:
12-dehydrocholate.Subgroup.2	-0.0316080185635528	0.038228756855531	0.408343		Unadjusted <0.05
12-dehydrocholate.Subgroup.3	-0.00305136680403787	0.0295137907869149	0.917655		Adjusted <0.00208
12-dehydrocholate.Subgroup.4	-0.0120222072972483	0.0328144172239125	0.714089
12-dehydrocholate.Subgroup.5	-0.103795769525854	0.0337345294701819	0.00209207		Subgroup_matrix ~ x + age + sex + education + waist circumference + physical activity + energy intake + fiber + alcohol
12-dehydrocholate.Subgroup.6	0.125113066513324	0.022579857229177	3.00895e-08		n=930
12-dehydrocholate.Subgroup.7	-0.0222669232404997	0.0337397725457889	0.509279
12-dehydrocholate.Subgroup.8	-0.0164393241732202	0.0336348763089085	0.625013
12-dehydrocholate.Subgroup.9	-0.0216088967703859	0.0333819589161464	0.517423
12-dehydrocholate.Subgroup.10	-0.0583657949648608	0.0359480976529948	0.104458
12-dehydrocholate.Subgroup.11	-0.0149926708091974	0.0404580953076804	0.710956
12-dehydrocholate.Subgroup.12	0.0290707500611284	0.0235544923097898	0.217132
12-dehydrocholate.Subgroup.13	0.0885846971794093	0.0207502082216371	1.96264e-05
12-dehydrocholate.Subgroup.14	-0.0972641855877256	0.0391607955978443	0.013002
12-dehydrocholate.Subgroup.15	-0.0196509689746896	0.0345890274445883	0.569949
12-dehydrocholate.Subgroup.16	-0.131147017924099	0.0408390366071052	0.00132129
12-dehydrocholate.Subgroup.17	-0.0648278985596745	0.0373440410745086	0.0825703
12-dehydrocholate.Subgroup.18	-0.102789469270133	0.0389057179604383	0.00824145
12-dehydrocholate.Subgroup.19	0.000371542095897748	0.0321846628181041	0.990789
12-dehydrocholate.Subgroup.20	-0.127199362843083	0.040412941503637	0.00164678
Metabolite	Estimate	Std. Error	Pr(>|z|)
3b-hydroxy-5-cholenoic acid.Subgroup.1	-0.0494990520173015	0.033919770686393	0.144483
3b-hydroxy-5-cholenoic acid.Subgroup.2	-0.03664770149225	0.0343115296320357	0.285481
3b-hydroxy-5-cholenoic acid.Subgroup.3	-0.00947441584927948	0.0308687638488432	0.7589
3b-hydroxy-5-cholenoic acid.Subgroup.4	-0.0359369192240114	0.03284953811634	0.273961
3b-hydroxy-5-cholenoic acid.Subgroup.5	-0.16809198606423	0.0350735080847839	1.64664e-06
3b-hydroxy-5-cholenoic acid.Subgroup.6	0.025108489161831	0.0312014000671451	0.420979
3b-hydroxy-5-cholenoic acid.Subgroup.7	-0.0811500924235386	0.0356502837459213	0.0228291
3b-hydroxy-5-cholenoic acid.Subgroup.8	-0.0263267405995937	0.0329831300905889	0.424761
3b-hydroxy-5-cholenoic acid.Subgroup.9	-0.045104680562741	0.0321836377857695	0.161071
3b-hydroxy-5-cholenoic acid.Subgroup.10	-0.0379824798661561	0.0323796280842134	0.240781
3b-hydroxy-5-cholenoic acid.Subgroup.11	-0.0212475586062451	0.0329765059466276	0.519365
3b-hydroxy-5-cholenoic acid.Subgroup.12	-0.0469407970017562	0.031927946298053	0.141505
3b-hydroxy-5-cholenoic acid.Subgroup.13	0.00800251371404081	0.032332043726693	0.804513
3b-hydroxy-5-cholenoic acid.Subgroup.14	-0.0626026110297043	0.0321105765909384	0.0512244
3b-hydroxy-5-cholenoic acid.Subgroup.15	-0.0346137961329986	0.0340317204067882	0.309104
3b-hydroxy-5-cholenoic acid.Subgroup.16	-0.106219564880001	0.0343775091096956	0.00200293
3b-hydroxy-5-cholenoic acid.Subgroup.17	-0.0298942432105032	0.0327062570958135	0.360705
3b-hydroxy-5-cholenoic acid.Subgroup.18	-0.0190806922620134	0.0318411018102182	0.549008
3b-hydroxy-5-cholenoic acid.Subgroup.19	0.00765314350857481	0.0329915536457782	0.816559
3b-hydroxy-5-cholenoic acid.Subgroup.20	-0.0264741639558041	0.0296304303092747	0.371601
Metabolite	Estimate	Std. Error	Pr(>|z|)
6-oxolithocholate.Subgroup.1	0.0243779073698385	0.0305230598394067	0.424481
6-oxolithocholate.Subgroup.2	0.0262288057484334	0.0314974639311627	0.404998
6-oxolithocholate.Subgroup.3	0.00319098174988511	0.0329049145579294	0.922746
6-oxolithocholate.Subgroup.4	-0.013527347996881	0.0323050431995937	0.675408
6-oxolithocholate.Subgroup.5	-0.00874846735782793	0.0296817344169923	0.768191
6-oxolithocholate.Subgroup.6	-0.0728672389304023	0.0340730194589618	0.0324712
6-oxolithocholate.Subgroup.7	-0.0223840322740143	0.0298690883625367	0.453613
6-oxolithocholate.Subgroup.8	-0.0046717052434386	0.0332116126382018	0.888135
6-oxolithocholate.Subgroup.9	0.062126309701433	0.0310924656502172	0.0457042
6-oxolithocholate.Subgroup.10	0.0290537925756955	0.0315129494929031	0.356548
6-oxolithocholate.Subgroup.11	0.0871625075834653	0.0319161081117702	0.00631448
6-oxolithocholate.Subgroup.12	-0.0572403201421673	0.0325663314981287	0.0788065
6-oxolithocholate.Subgroup.13	-0.11136199589141	0.0319648389306215	0.000494182
6-oxolithocholate.Subgroup.14	0.017897428810483	0.0328245770487147	0.585585
6-oxolithocholate.Subgroup.15	-0.0223730283345664	0.032290328374372	0.488391
6-oxolithocholate.Subgroup.16	-0.0925186535286498	0.0327093587258634	0.00467657
6-oxolithocholate.Subgroup.17	0.0249569250617105	0.0307830972554659	0.417518
6-oxolithocholate.Subgroup.18	-0.0376766341834131	0.0317944179392992	0.236014
6-oxolithocholate.Subgroup.19	-0.0114528364491266	0.03424292781101	0.738034
6-oxolithocholate.Subgroup.20	0.0282992851461441	0.0321529463613262	0.37878
Metabolite	Estimate	Std. Error	Pr(>|z|)
7,12-diketolithocholate.Subgroup.1	-0.0895527829267738	0.035209090971753	0.0109762
7,12-diketolithocholate.Subgroup.2	-0.0178568971981425	0.0340884601788349	0.60039
7,12-diketolithocholate.Subgroup.3	-0.0215841215817277	0.0300446024567139	0.472509
7,12-diketolithocholate.Subgroup.4	0.00982649536012636	0.0313360116671181	0.753836
7,12-diketolithocholate.Subgroup.5	-0.0871948900233458	0.0365483096489619	0.0170446
7,12-diketolithocholate.Subgroup.6	0.169366059564981	0.0239997587807976	1.70148e-12
7,12-diketolithocholate.Subgroup.7	0.0744035247113914	0.0319823870804997	0.0199977
7,12-diketolithocholate.Subgroup.8	-0.0148522053797077	0.0339284671608242	0.661567
7,12-diketolithocholate.Subgroup.9	-0.0239291357274139	0.032960913718242	0.467848
7,12-diketolithocholate.Subgroup.10	-0.0716885584434425	0.0372635493276909	0.0543765
7,12-diketolithocholate.Subgroup.11	-0.0355818075464582	0.0352096404239353	0.312222
7,12-diketolithocholate.Subgroup.12	0.05130302469229	0.0265752685830183	0.0535474
7,12-diketolithocholate.Subgroup.13	0.112356855643013	0.0221910077941416	4.12341e-07
7,12-diketolithocholate.Subgroup.14	-0.0997164398895703	0.0382065060340745	0.00905598
7,12-diketolithocholate.Subgroup.15	-0.0194079956068525	0.0316498059556172	0.539737
7,12-diketolithocholate.Subgroup.16	-0.181250819488438	0.0443253664459156	4.33052e-05
7,12-diketolithocholate.Subgroup.17	-0.0294107246685602	0.0328878881030152	0.371176
7,12-diketolithocholate.Subgroup.18	-0.081315246141264	0.0367027853684931	0.0267253
7,12-diketolithocholate.Subgroup.19	-0.00733503411575682	0.0320051918969472	0.818727
7,12-diketolithocholate.Subgroup.20	-0.12462896319919	0.0401575392070887	0.00191246
Metabolite	Estimate	Std. Error	Pr(>|z|)
7-ketodeoxycholate.Subgroup.1	-0.146167885250078	0.0445515879832817	0.00103488
7-ketodeoxycholate.Subgroup.2	-0.028915803948977	0.0357954041288338	0.419201
7-ketodeoxycholate.Subgroup.3	-0.0210972680962511	0.0330192025078661	0.522862
7-ketodeoxycholate.Subgroup.4	0.0136528293238491	0.0364079276212263	0.707663
7-ketodeoxycholate.Subgroup.5	-0.148942966005105	0.0429495297081281	0.00052462
7-ketodeoxycholate.Subgroup.6	0.175232630728978	0.0197579148801193	7.38163e-19
7-ketodeoxycholate.Subgroup.7	-0.0549589427517611	0.033611184328255	0.10202
7-ketodeoxycholate.Subgroup.8	-0.00392916065812011	0.0347619434895052	0.910006
7-ketodeoxycholate.Subgroup.9	-0.0148558126588494	0.0353471915526144	0.674279
7-ketodeoxycholate.Subgroup.10	-0.0677921708934674	0.0391536375577194	0.0833733
7-ketodeoxycholate.Subgroup.11	-0.0332148258529098	0.0354594058728188	0.348913
7-ketodeoxycholate.Subgroup.12	0.0523073381480172	0.026697711435008	0.0500842
7-ketodeoxycholate.Subgroup.13	0.121215019719067	0.0198435975611547	1.00559e-09
7-ketodeoxycholate.Subgroup.14	-0.108883468731929	0.0424262686155739	0.0102755
7-ketodeoxycholate.Subgroup.15	-0.00716906733902427	0.0353373421326729	0.839233
7-ketodeoxycholate.Subgroup.16	-0.14077613560576	0.0433975690554818	0.00117917
7-ketodeoxycholate.Subgroup.17	-0.0396961417913812	0.0402651903479175	0.324198
7-ketodeoxycholate.Subgroup.18	-0.0874647461874466	0.0395643442611047	0.0270569
7-ketodeoxycholate.Subgroup.19	0.0150256619459053	0.0309615812992587	0.627463
7-ketodeoxycholate.Subgroup.20	-0.127095317471654	0.044449816985578	0.00424578
Metabolite	Estimate	Std. Error	Pr(>|z|)
dehydrolithocholate.Subgroup.1	0.125903742730772	0.0287535693613174	1.1938e-05
dehydrolithocholate.Subgroup.2	0.011135580382869	0.0324864638866116	0.731767
dehydrolithocholate.Subgroup.3	0.0234512076379607	0.0326372583072228	0.472424
dehydrolithocholate.Subgroup.4	0.00982692667933325	0.0328999513919232	0.765176
dehydrolithocholate.Subgroup.5	-0.051994187648061	0.0311645751080625	0.0952414
dehydrolithocholate.Subgroup.6	-0.048334265835515	0.0318973568169286	0.129695
dehydrolithocholate.Subgroup.7	-0.0482064632136581	0.0314157223980173	0.124914
dehydrolithocholate.Subgroup.8	0.0053219366853347	0.0335428313289063	0.873936
dehydrolithocholate.Subgroup.9	0.047416813677975	0.0332018130386589	0.153252
dehydrolithocholate.Subgroup.10	0.0264473644105301	0.0325806633154296	0.416935
dehydrolithocholate.Subgroup.11	0.0524067852964185	0.032208552970126	0.103714
dehydrolithocholate.Subgroup.12	-0.0377871724050817	0.0301545060992974	0.210163
dehydrolithocholate.Subgroup.13	-0.0321659301508562	0.0302965928134662	0.288371
dehydrolithocholate.Subgroup.14	0.0829603222726414	0.032133591101584	0.00983059
dehydrolithocholate.Subgroup.15	-0.00322545907670311	0.0319175357882629	0.919506
dehydrolithocholate.Subgroup.16	-0.0727937849347712	0.0301389845420616	0.0157235
dehydrolithocholate.Subgroup.17	0.060071097348988	0.0325308917734871	0.0648071
dehydrolithocholate.Subgroup.18	0.0552536188821667	0.0296150244300239	0.0620792
dehydrolithocholate.Subgroup.19	-0.000150729386971234	0.0328948041153573	0.996344
dehydrolithocholate.Subgroup.20	0.151501089730901	0.0289604257510223	1.68309e-07
Metabolite	Estimate	Std. Error	Pr(>|z|)
deoxycholate.Subgroup.1	-0.010207790559265	0.0330820004997038	0.757656
deoxycholate.Subgroup.2	-0.0240258105156983	0.0366845244311455	0.512513
deoxycholate.Subgroup.3	0.00057195910472136	0.0312823543932218	0.985412
deoxycholate.Subgroup.4	-0.0079671983854633	0.0320690283768014	0.803795
deoxycholate.Subgroup.5	-0.222757985221089	0.0444363961085731	5.35984e-07
deoxycholate.Subgroup.6	0.0717533835104138	0.0241778368943771	0.00300004
deoxycholate.Subgroup.7	-0.0129999326926809	0.0354008634725374	0.713454
deoxycholate.Subgroup.8	-0.0221096530073984	0.0348466403797207	0.525765
deoxycholate.Subgroup.9	-0.0320405710852765	0.0323989700428292	0.322694
deoxycholate.Subgroup.10	-0.0311681740303233	0.0345282795538058	0.366693
deoxycholate.Subgroup.11	-0.0506105856617623	0.0354701528242095	0.153623
deoxycholate.Subgroup.12	0.00770603967955493	0.0272409365808035	0.777265
deoxycholate.Subgroup.13	0.0737565011127366	0.0244764553097726	0.00258368
deoxycholate.Subgroup.14	-0.187169145304459	0.0468463501997565	6.45896e-05
deoxycholate.Subgroup.15	0.0259983777819258	0.0381103246445591	0.495121
deoxycholate.Subgroup.16	-0.174395411643593	0.0399813261331284	1.28925e-05
deoxycholate.Subgroup.17	-0.0199823390035661	0.0352168943870919	0.570437
deoxycholate.Subgroup.18	-0.0273251303418004	0.0325166167733734	0.400716
deoxycholate.Subgroup.19	0.0169565734485188	0.0325070778753843	0.60193
deoxycholate.Subgroup.20	-0.126929200318218	0.0408195700272072	0.00187393
Metabolite	Estimate	Std. Error	Pr(>|z|)
glycodeoxycholate.Subgroup.1	-0.0153218792290483	0.0311963062597866	0.623325
glycodeoxycholate.Subgroup.2	-0.00839726296966757	0.0352441378837657	0.81168
glycodeoxycholate.Subgroup.3	0.00962703247751066	0.0352426104425983	0.784727
glycodeoxycholate.Subgroup.4	0.00237836909105131	0.0325789811052752	0.941804
glycodeoxycholate.Subgroup.5	-0.0719857365835223	0.0341589170134114	0.0350849
glycodeoxycholate.Subgroup.6	0.0856602176662477	0.0226890474378485	0.000159751
glycodeoxycholate.Subgroup.7	-0.037103046176881	0.0319365138105242	0.245327
glycodeoxycholate.Subgroup.8	-0.00370708050235577	0.033518229923447	0.911934
glycodeoxycholate.Subgroup.9	0.00583539610251348	0.0343995722515385	0.865297
glycodeoxycholate.Subgroup.10	-0.0250377912632714	0.0381863372448679	0.512034
glycodeoxycholate.Subgroup.11	-0.0320390970067823	0.0345314968689719	0.3535
glycodeoxycholate.Subgroup.12	0.0364521272474422	0.0306837144417463	0.234835
glycodeoxycholate.Subgroup.13	0.0539462118428341	0.0237950005643392	0.0233827
glycodeoxycholate.Subgroup.14	-0.0580388305907404	0.038930151087709	0.136002
glycodeoxycholate.Subgroup.15	0.0207040739037239	0.0353397671194682	0.557971
glycodeoxycholate.Subgroup.16	-0.0754660125503325	0.039076593065171	0.0534542
glycodeoxycholate.Subgroup.17	-0.0450657239940647	0.0345478736656971	0.192083
glycodeoxycholate.Subgroup.18	-0.0578953186059736	0.0363118229686474	0.110848
glycodeoxycholate.Subgroup.19	0.00263672034888517	0.0306290259570002	0.931398
glycodeoxycholate.Subgroup.20	-0.103857817830745	0.0412207387046283	0.0117504
Metabolite	Estimate	Std. Error	Pr(>|z|)
glycoursodeoxycholate.Subgroup.1	-0.0352851240973936	0.0322607962330909	0.274066
glycoursodeoxycholate.Subgroup.2	-0.027375657433502	0.0371787878828819	0.461533
glycoursodeoxycholate.Subgroup.3	0.0081644181333727	0.0345965627570564	0.813441
glycoursodeoxycholate.Subgroup.4	0.00183981462443039	0.0319418203651634	0.954068
glycoursodeoxycholate.Subgroup.5	-0.0475044586134831	0.0308610963234132	0.123731
glycoursodeoxycholate.Subgroup.6	0.116100145069683	0.0225668952812006	2.67934e-07
glycoursodeoxycholate.Subgroup.7	-0.0251709066634271	0.0316975669045498	0.42714
glycoursodeoxycholate.Subgroup.8	0.00251660557313828	0.0347531296716556	0.942273
glycoursodeoxycholate.Subgroup.9	-0.0150137973903812	0.0364255466281655	0.680209
glycoursodeoxycholate.Subgroup.10	-0.0487132738533604	0.041703708375537	0.242774
glycoursodeoxycholate.Subgroup.11	-0.0404698486775756	0.0369613823926408	0.273551
glycoursodeoxycholate.Subgroup.12	0.00574684581841296	0.0312599777207515	0.854139
glycoursodeoxycholate.Subgroup.13	0.0969826831150145	0.020680369063581	2.73738e-06
glycoursodeoxycholate.Subgroup.14	-0.0416702828538152	0.0376971798393798	0.268988
glycoursodeoxycholate.Subgroup.15	0.0272334161292064	0.0327783904787154	0.406067
glycoursodeoxycholate.Subgroup.16	-0.078153903385402	0.0388129649129565	0.0440512
glycoursodeoxycholate.Subgroup.17	-0.0497651238738107	0.0383268717521984	0.194136
glycoursodeoxycholate.Subgroup.18	-0.0328148020634727	0.0350179896349461	0.348715
glycoursodeoxycholate.Subgroup.19	0.0392860533476343	0.0355777500250754	0.269493
glycoursodeoxycholate.Subgroup.20	-0.102188951792326	0.0496768132732889	0.039679
Metabolite	Estimate	Std. Error	Pr(>|z|)
hyocholate.Subgroup.1	-0.0588439112966012	0.0344463922137228	0.0875853
hyocholate.Subgroup.2	-0.0214556286097235	0.0339507925827646	0.527411
hyocholate.Subgroup.3	-0.00286863480908053	0.0305068219199015	0.925083
hyocholate.Subgroup.4	0.0182564558298998	0.03164311148362	0.563974
hyocholate.Subgroup.5	-0.0186388306061351	0.0309283897250369	0.546745
hyocholate.Subgroup.6	0.0779457267499374	0.0284794224956876	0.00620185
hyocholate.Subgroup.7	-0.0298858285787333	0.0295485082761176	0.311817
hyocholate.Subgroup.8	-0.00380908526135052	0.0327328848441335	0.90736
hyocholate.Subgroup.9	-0.0189896389040381	0.0327520212629656	0.562049
hyocholate.Subgroup.10	-0.0481345369176932	0.0336900003238919	0.153077
hyocholate.Subgroup.11	-0.0276680787589112	0.0353905582582985	0.434336
hyocholate.Subgroup.12	0.0449050343338059	0.027618065301063	0.103965
hyocholate.Subgroup.13	0.0629016925898189	0.025907755551471	0.0151861
hyocholate.Subgroup.14	-0.0861298411382315	0.0369650860933743	0.0198044
hyocholate.Subgroup.15	0.000720389777573512	0.0333508267990665	0.982767
hyocholate.Subgroup.16	-0.0400247271776858	0.0355728333300853	0.260526
hyocholate.Subgroup.17	-0.0257574450673054	0.0350434150001831	0.46233
hyocholate.Subgroup.18	-0.0861462381020411	0.035952160111275	0.016569
hyocholate.Subgroup.19	0.00440186140962072	0.0324276027972761	0.892023
hyocholate.Subgroup.20	-0.121562619585152	0.0385969049307646	0.00163526
Metabolite	Estimate	Std. Error	Pr(>|z|)
isoursodeoxycholate.Subgroup.1	-0.178479787749243	0.0414631606037327	1.67334e-05
isoursodeoxycholate.Subgroup.2	-0.0361281688751173	0.0359490772910228	0.314906
isoursodeoxycholate.Subgroup.3	0.0177381561238966	0.0308762682976733	0.565635
isoursodeoxycholate.Subgroup.4	-0.00792118812489859	0.0328113326862927	0.809233
isoursodeoxycholate.Subgroup.5	-0.11646700480623	0.0398456834966148	0.0034673
isoursodeoxycholate.Subgroup.6	0.208001005263004	0.0249657183727302	7.98481e-17
isoursodeoxycholate.Subgroup.7	-0.0408954704320273	0.0376817664292093	0.277795
isoursodeoxycholate.Subgroup.8	-0.0129781240675682	0.0351994727871132	0.71235
isoursodeoxycholate.Subgroup.9	-0.00860468258543929	0.0333227448820576	0.796235
isoursodeoxycholate.Subgroup.10	-0.0581596511939708	0.0383358138173136	0.129239
isoursodeoxycholate.Subgroup.11	-0.0424517115310048	0.0360105646507196	0.238451
isoursodeoxycholate.Subgroup.12	0.114720950743083	0.0279907515912567	4.15781e-05
isoursodeoxycholate.Subgroup.13	0.169463192556126	0.0233335104149822	3.7957e-13
isoursodeoxycholate.Subgroup.14	-0.16801971779758	0.0432160362561567	0.000101114
isoursodeoxycholate.Subgroup.15	-0.0232401138109161	0.0343705029926961	0.498936
isoursodeoxycholate.Subgroup.16	-0.207763020923513	0.0433118538697201	1.61133e-06
isoursodeoxycholate.Subgroup.17	-0.0679044989221095	0.0370992727762034	0.0671982
isoursodeoxycholate.Subgroup.18	-0.141571693566979	0.0424265463385031	0.000847288
isoursodeoxycholate.Subgroup.19	0.0295784281135206	0.0342983292067461	0.388475
isoursodeoxycholate.Subgroup.20	-0.216333718515457	0.0447870818553472	1.36348e-06
Metabolite	Estimate	Std. Error	Pr(>|z|)
lithocholate.Subgroup.1	-0.141028733669246	0.0383711333952616	0.00023749
lithocholate.Subgroup.2	-0.0349270799526974	0.0354692495505394	0.324764
lithocholate.Subgroup.3	-0.00230859170169256	0.0321158731594131	0.942695
lithocholate.Subgroup.4	0.000882784232133322	0.0325703822793044	0.978377
lithocholate.Subgroup.5	-0.134411651171489	0.0369610865204891	0.00027629
lithocholate.Subgroup.6	0.187406917274227	0.026403377182089	1.26723e-12
lithocholate.Subgroup.7	-0.057986798703545	0.0305634638921199	0.0577938
lithocholate.Subgroup.8	-0.0102920876936809	0.0354426416098137	0.77152
lithocholate.Subgroup.9	-0.0300431847556085	0.0362768762166409	0.407578
lithocholate.Subgroup.10	-0.0745884054617486	0.0367731743022645	0.0425258
lithocholate.Subgroup.11	-0.0514812349141857	0.0357013737210733	0.149304
lithocholate.Subgroup.12	0.0442442554306116	0.0279985060111334	0.114053
lithocholate.Subgroup.13	0.0894776569891739	0.0254633194777384	0.000441442
lithocholate.Subgroup.14	-0.151372021211477	0.041632386913979	0.00027699
lithocholate.Subgroup.15	-0.0176348545719108	0.0330242160669488	0.593343
lithocholate.Subgroup.16	-0.177763516443755	0.0409467452102963	1.4162e-05
lithocholate.Subgroup.17	-0.0551375612158877	0.0359278847377818	0.124864
lithocholate.Subgroup.18	-0.0903938271152593	0.0374787725264055	0.0158711
lithocholate.Subgroup.19	0.0272411002436627	0.03298274561986	0.40885
lithocholate.Subgroup.20	-0.191633504623515	0.0446195591232939	1.74826e-05
Metabolite	Estimate	Std. Error	Pr(>|z|)
ursocholate.Subgroup.1	0.0259389491362887	0.0293943339580568	0.377535
ursocholate.Subgroup.2	-0.0109003071099666	0.033218384852968	0.742805
ursocholate.Subgroup.3	0.0293280688976153	0.0316924975278868	0.354761
ursocholate.Subgroup.4	-0.0116166509292089	0.0325221364511981	0.720948
ursocholate.Subgroup.5	-0.124497048761666	0.0357834881068427	0.000502958
ursocholate.Subgroup.6	0.051007423297435	0.0319138280423	0.109979
ursocholate.Subgroup.7	0.0043080310277431	0.0309372395411868	0.889252
ursocholate.Subgroup.8	-0.0113626770425876	0.0334625016341778	0.734185
ursocholate.Subgroup.9	-0.00219025787680206	0.0301198771179275	0.942031
ursocholate.Subgroup.10	-0.00954481517211125	0.030680161514113	0.755719
ursocholate.Subgroup.11	-0.0251342909645052	0.0326203984999587	0.440998
ursocholate.Subgroup.12	0.00848873162013725	0.0292411726811974	0.771586
ursocholate.Subgroup.13	0.0633388923367808	0.0310938374934795	0.0416476
ursocholate.Subgroup.14	-0.0715285935609829	0.036826258057838	0.0520977
ursocholate.Subgroup.15	0.0158279217844727	0.0315350087085303	0.615727
ursocholate.Subgroup.16	-0.106466183253678	0.0328180729869828	0.00117809
ursocholate.Subgroup.17	-0.00133941481826227	0.032596380658141	0.967223
ursocholate.Subgroup.18	-0.0243416845793887	0.0316123303871163	0.441296
ursocholate.Subgroup.19	0.0177848242599433	0.0325321178403069	0.584595
ursocholate.Subgroup.20	-0.0437535094816468	0.0324535033603295	0.177597
Metabolite	Estimate	Std. Error	Pr(>|z|)
ursodeoxycholate.Subgroup.1	-0.146031937140216	0.0437935466287408	0.000854364
ursodeoxycholate.Subgroup.2	-0.017846203016912	0.0346610397710099	0.606638
ursodeoxycholate.Subgroup.3	0.0274732555644056	0.0301880246561398	0.362785
ursodeoxycholate.Subgroup.4	-0.00453311974210414	0.0324816670994883	0.889008
ursodeoxycholate.Subgroup.5	-0.152438037188668	0.0429173077114337	0.000382458
ursodeoxycholate.Subgroup.6	0.210787565961597	0.0241950503713146	2.98528e-18
ursodeoxycholate.Subgroup.7	-0.0735500555893628	0.0344219855902811	0.032621
ursodeoxycholate.Subgroup.8	0.00637731156821312	0.0347191909842107	0.854262
ursodeoxycholate.Subgroup.9	-0.0103554179600777	0.0364716865996417	0.776464
ursodeoxycholate.Subgroup.10	-0.0617103047651024	0.036481007966244	0.0907273
ursodeoxycholate.Subgroup.11	-0.0310233822948763	0.0355429821521197	0.38275
ursodeoxycholate.Subgroup.12	0.0775923141821652	0.0257548171349396	0.00258909
ursodeoxycholate.Subgroup.13	0.134123408289014	0.0240044842131349	2.30453e-08
ursodeoxycholate.Subgroup.14	-0.107192671051131	0.0432561328667151	0.0132087
ursodeoxycholate.Subgroup.15	-0.00268716404030865	0.0305540751261262	0.929918
ursodeoxycholate.Subgroup.16	-0.152372142125323	0.0450622429794998	0.000721252
ursodeoxycholate.Subgroup.17	-0.0374042009660938	0.0355537413090006	0.292778
ursodeoxycholate.Subgroup.18	-0.0759146515918833	0.0396885947733913	0.0557791
ursodeoxycholate.Subgroup.19	0.0496573919166155	0.0306196401960002	0.104857
ursodeoxycholate.Subgroup.20	-0.134613309292494	0.0468598288288723	0.00407006
